# Supplementary material for: A global comparison of surface and subsurface microbiomes reveals large-scale biodiversity gradients, and a marine-terrestrial divide
Source: PubMed Central journal article supplement — Sci Adv. 2024 Dec 18;10(51):eadq0645. doi: 10.1126/sciadv.adq0645 (PMC11654699; doi:10.1126/sciadv.adq0645), 2024-12-18
Supplement: sciadv.adq0645_sm.pdf [file sciadv.adq0645_sm.pdf]

Supplementary Materials for  
**A global comparison of surface and subsurface microbiomes reveals large-scale biodiversity gradients, and a marine-terrestrial divide**

S. Emil Ruff *et al.*

Corresponding author: S. Emil Ruff, [eruff@mbi.edu](mailto:eruff@mbi.edu)

*Sci. Adv.* **10**, eadq0645 (2024)  
DOI: 10.1126/sciadv.adq0645

**The PDF file includes:**

Supplementary Text  
Supplementary Methods  
Figs. S1 to S24  
Legends for datasets S1 to S12  
Legends for movies S1 and S2  
References

**Other Supplementary Material for this manuscript includes the following:**

Datasets S1 to S12  
Movies S1 and S2

## Supplementary Text

### The Census of Deep Life synthesis (continued)

Further details concerning the datasets that we used for this global synthesis project can be found on the VAMPS website (<https://vamps2.mbl.edu/>) as well as in research studies that have already been published using NCBI project accession numbers (Dataset S1). Datasets that were part of the Census of Deep Life (CoDL) have featured in investigations of volcanoes (158, 159), deep terrestrial subsurface (7, 107, 160–162), methane-rich springs (163–165), mineral water springs (166, 167), ultradeep bedrock (108), rock fracture fluids (168–171), caves (121), marine seafloor (172, 173), marine sediments (174–176), hydrothermal sediments (46, 177–179), hydrothermal vents (180), marine hydrocarbon plumes (181), and marine mud volcanoes (33, 182). We also included amplicon datasets that were not part of the CoDL, *e.g.*, investigating marine sediments (183–185), polluted sediments and waters (186–188).

Due to the large number of datasets, and the very different interests of the researchers leading each project, only a limited set of environmental parameters was available for each sample. In addition to latitude, longitude, and depth (Fig. 1A, B), we have information on the sample material (Fig. S1A), pH (Fig. S1B), and temperature (Fig. S1C) for most samples. About half of the samples that qualified based on their physicochemical contextual data, *i.e.* they originated from a suitable depth layer, were removed during the rigorous quality control of the sequencing datasets, mainly because they had too many contaminants or too little reads and were then considered a failed sequencing run. The remaining 85 archaeal and 122 bacterial sequence datasets in the “subsurface” category originated from 0.2 – 491 m below the seafloor and 15 – 4375 m below ground.

### Marine surface conditions may be imprinted in subsurface sediments

We show differences in the archaeal and bacterial communities in marine subseafloor shelf, slope, and abyssal sedimentary environments (Fig. S24), consistent with the differences in cell-specific energy utilization across these different depositional settings (189). The differences in archaeal and bacterial richness and evenness between abyssal, slope and shelf subsurface sediments (Fig. S24A, C) are corroborated by differences in the community structure at respective environments (Fig. S24B, D). These findings support earlier studies that show similarities of surface and subsurface sedimentary communities suggesting that subsurface communities are shaped and imprinted by the shallow seafloor communities from which they are derived from (24–26). However, as the samples are not all from the same margin, and as the number of samples in each category is rather low the trend should be interpreted with caution.

## Supplementary Methods

### 16S rRNA gene amplicon-based community analyses (continued)

We have removed potential contaminant organisms affiliating with the following genera:

Aquabacterium|Pseudopropionibacterium|Cutibacterium|Propioniferax|Afipia|Beijerinckia|Bosea|Brevundimonas|Craurococcus|Methylobacterium|Roseomonas|Sphingomonas|Azoarcus|Acidovorax|Burkholderia|Comamonas|Cupriavidus|Curvibacter|Duganella|Herbaspirillum|Janthinobacterium|Kingella|Mas

silia|Oxalobacter|Pelomonas|Undibacterium|Acinetobacter|Enhydrobacter|Enterobacter|Escherichia|Pseudoxanthomonas|Stenotrophomonas|Xanthomonas|Aeromicrobium|Brevibacterium|Corynebacterium|Dietzia|Kocuria|Microbacterium|Microlunatus|Propionibacterium|Rhodococcus|Tsukamurella|Abiotrophia|Brochothrix|Facklamia|Streptococcus|Staphylococcus|Chryseobacterium|Dyadobacter|Wautersiella|Prevotella|Lactobacillus|Erysipelothrix|Rothia|Mycobacterium|Serratia|Staphylococcus|Bacteroides|Bifidobacterium|Shigella|Faecalibacterium|Haemophilus|Klebsiella|Lactobacillus|Listeria|Moraxella|Neisseria|Porphyromonas|Salmonella|Veillonella|Aeromonas|Pseudarcicella|Romboutsia|Cloacibacterium|Chloroplast'

This list is based on several papers of the recent years (64, 79, 80). However, the original contaminant list by Salter et al. (79) contains numerous lineages that are widespread in soil and sediment environments, hence the following organisms that originally were flagged as contaminants of DNA extraction kits were retained in our analyses:

Asticcacaulis|Aurantimonas|Azospira|Pseudomonas|Psychrobacter|Caulobacter|Devosia|Hoeftia|Novosphingobium|Paracoccus|Pedomicrobium|Sphingobium|Sphingopyxis|Delftia|Leptothrix|Limnobacter|Methylophilus|Methyloversatilis|Polaromonas|Schlegelella|Sulfuritalea|Nevskia|Beutenbergia|Janibacter|Micrococcus|Patulibacter|Bacillus|Brevibacillus|Paenibacillus|Flavobacterium|Hydrotalea|Niastella|Deinococcus|Ralstonia|Bradyrhizobium|Mesorhizobium|Ochrobactrum|Phyllobacterium|Rhizobium|Variovorax|Arthrobacter|Curtobacterium|Geodermatophilus|Olivibacter|Pedobacter

Based on recent literature searches and the focus of the study we added the following lineages as potential contaminants or eukaryotic remnants that were excluded from this analysis:

Aeromonas|Pseudarcicella|Romboutsia|Cloacibacterium|Chloroplast|Mitochondria

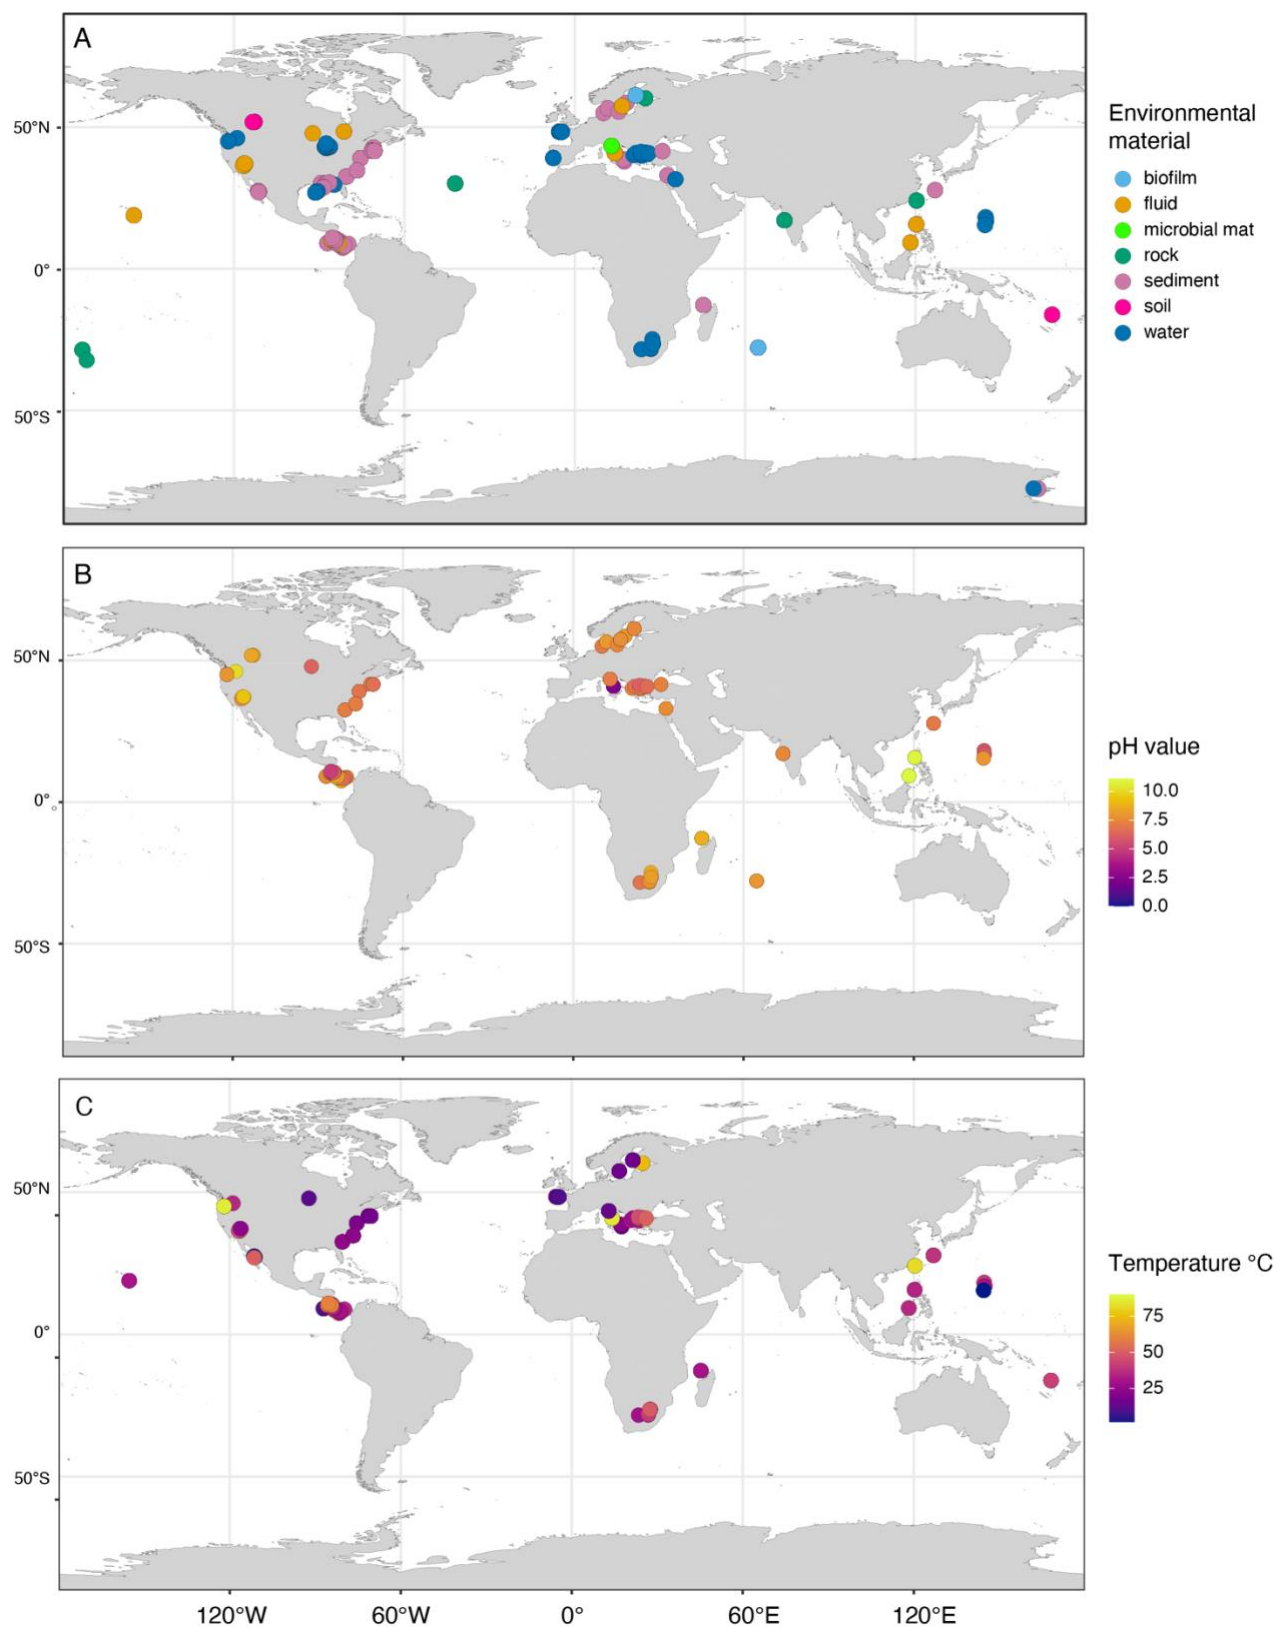

**Fig. S1: Maps of sampling sites.** Maps show the environmental material (A), pH (B), and temperature (C) of the collected samples.

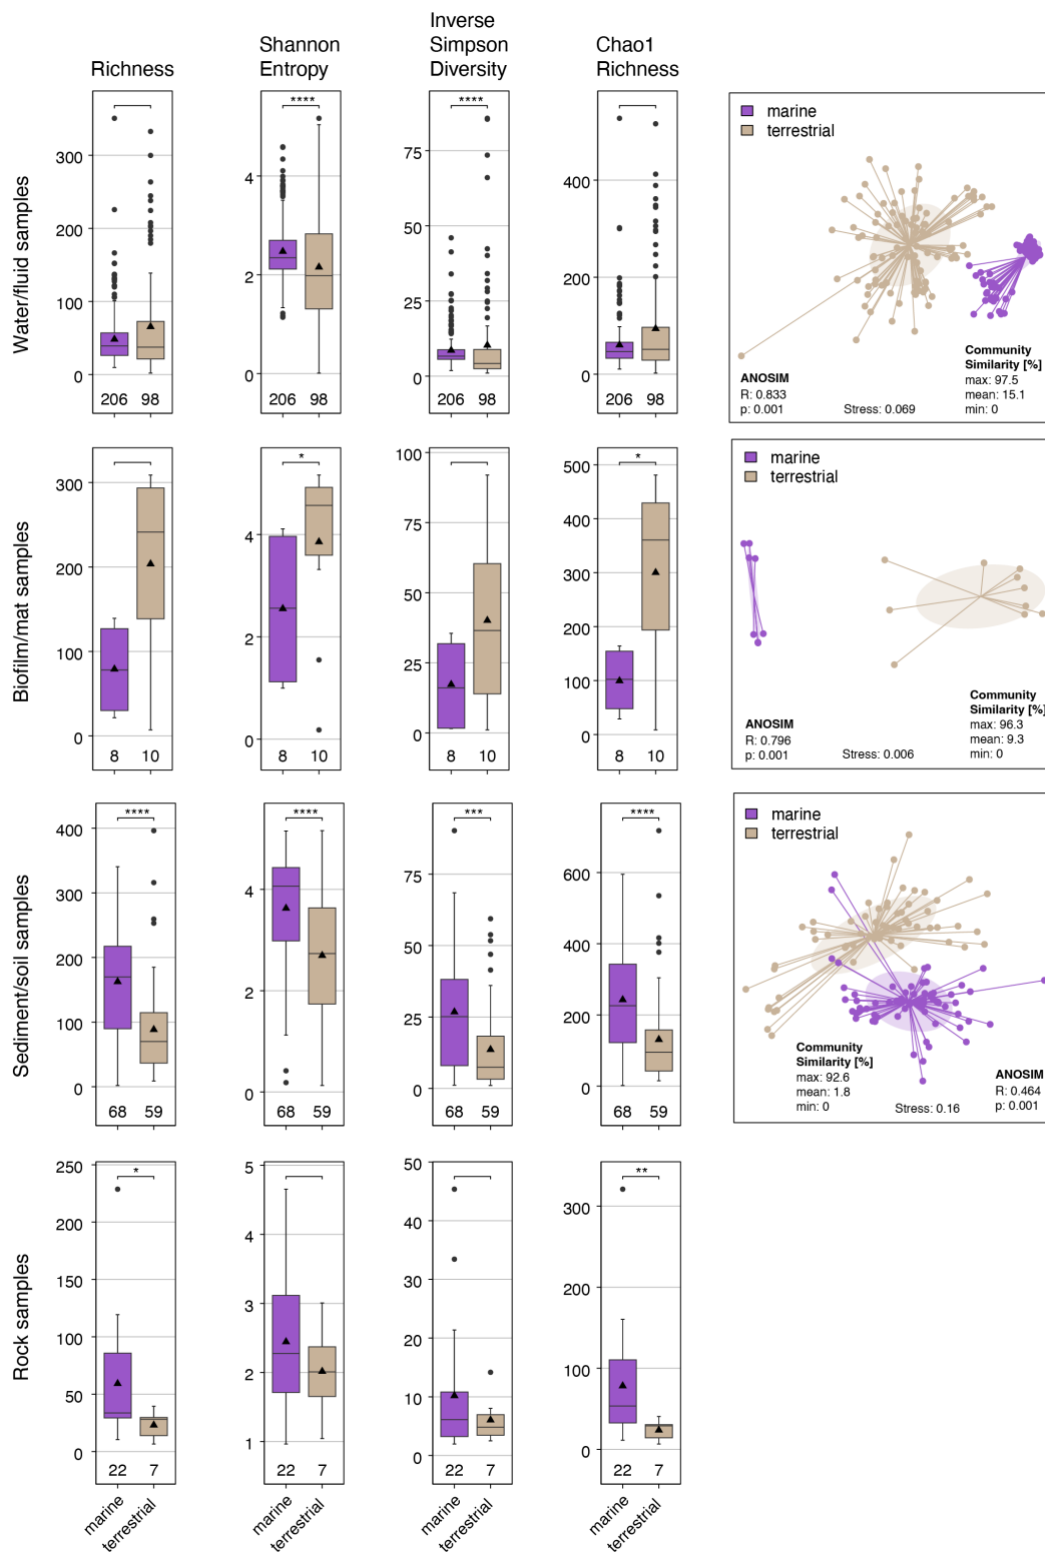

**Figure S2: Archaeal diversity in different sample materials grouped based on biomes.** We analyzed four sample materials in this study. We included comparable numbers of samples of each material from both biomes, to avoid introducing a bias caused by the type of sampled material. Sediment samples for example comprise a very high diversity, both in the marine and terrestrial biome and thus could bias the global trends if sediments were only analyzed for one of the biomes. Marine archaeal diversity in each of the materials is higher or similar to that found in the terrestrial biome (alpha diversity – boxplots), while community composition is very different (beta diversity – NMDS ordinations). Note: The ordination of rock samples is not shown due to a stress value close to zero, which is most often caused by insufficient data, yielding more than one possible solution.

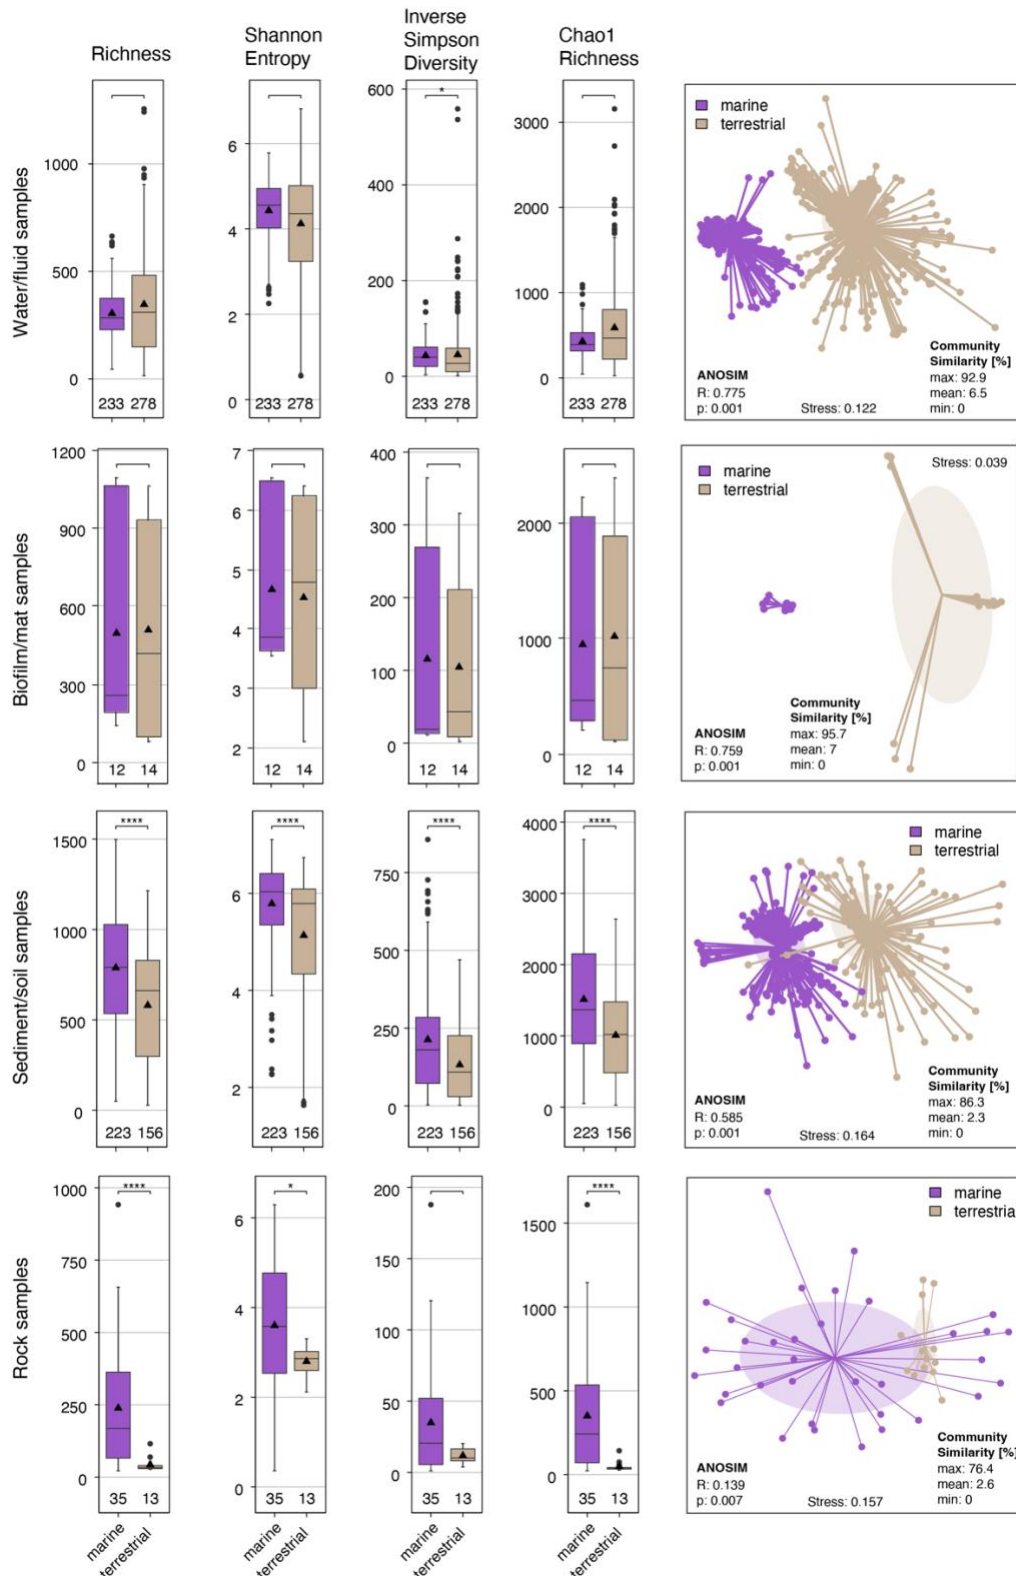

**Figure S3: Bacterial diversity in different sample materials grouped based on biomes.** We analyzed four sample materials in this study. We included comparable numbers of samples of each material from both biomes, to avoid introducing a bias caused by the type of sampled material. Sediment samples for example comprise a very high diversity, both in the marine and terrestrial biome and thus could bias the global trends if sediments were only analyzed for one of the biomes. Marine bacterial diversity in each of the materials is higher or similar to that found in the terrestrial biome (alpha diversity – boxplots), while community composition is very different (beta diversity – NMDS ordinations), except for rocks, where community composition was largely overlapping.

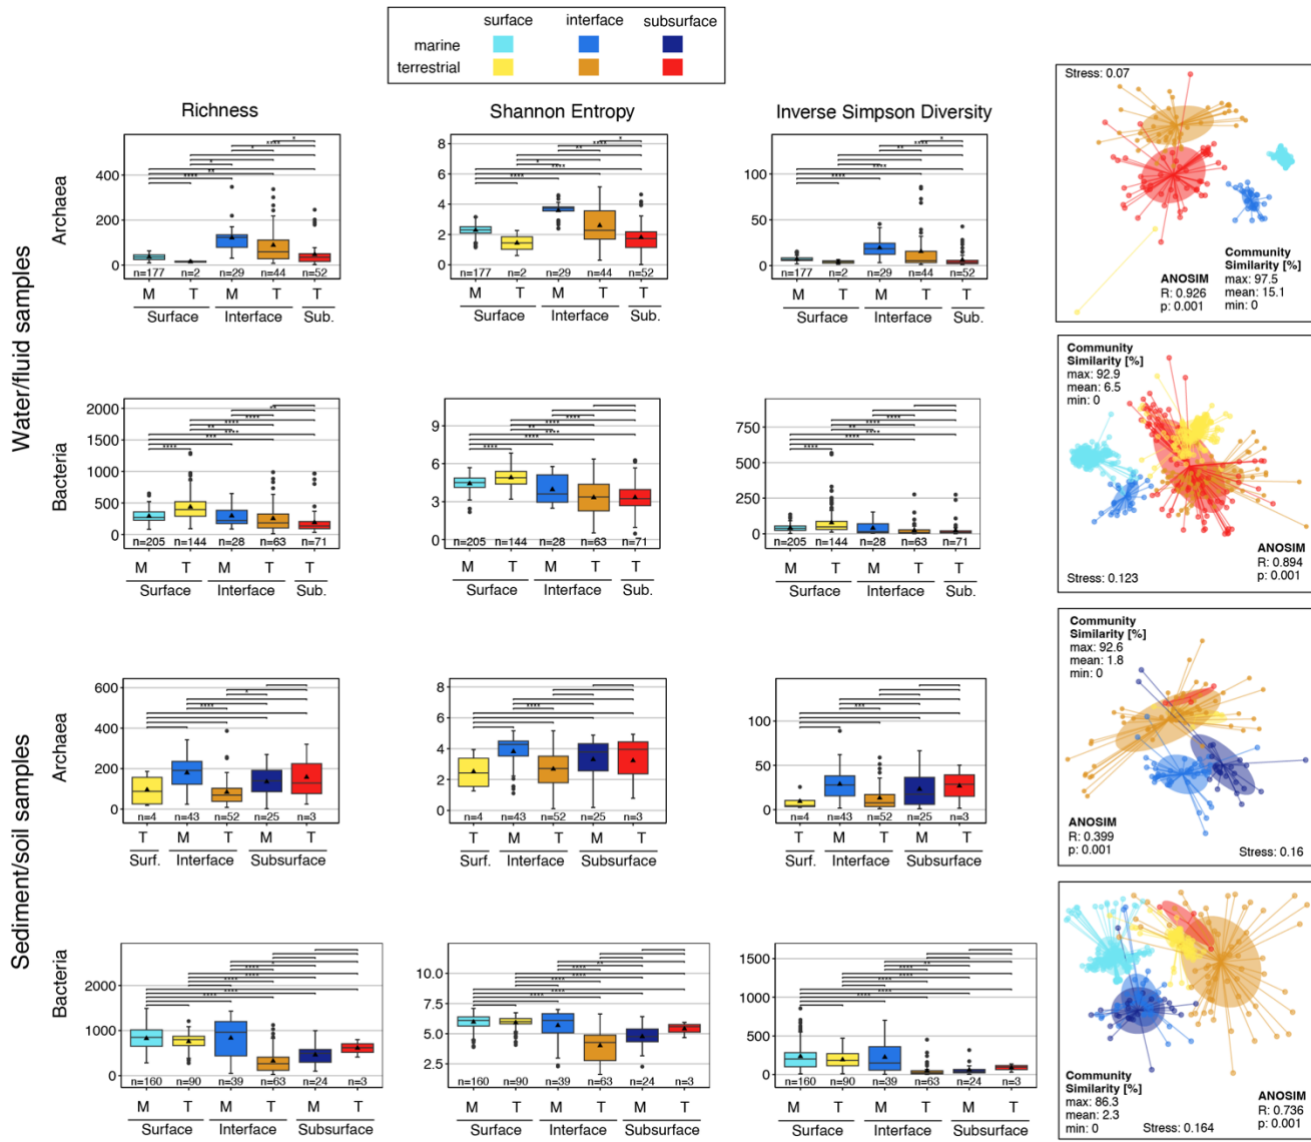

**Figure S4: Archaeal and bacterial diversity in water and sediment samples grouped based on biomes and depth realms.** The analyses of different sample materials from the depth realms shows similar trends as the overall analysis of depth realms, e.g., a very high archaeal diversity in subsurface samples, indicating the global trends highlighted in this work were not caused by a potential bias due to the sample materials. Here too community composition was very different between marine and terrestrial samples supporting a great divide, while composition often overlapped between surface interface and subsurface samples, supporting diversity gradients with depth. Note: Not all materials were available for all depth realms, and that boxplots are shown for consistency even for groups with very small sample numbers n.

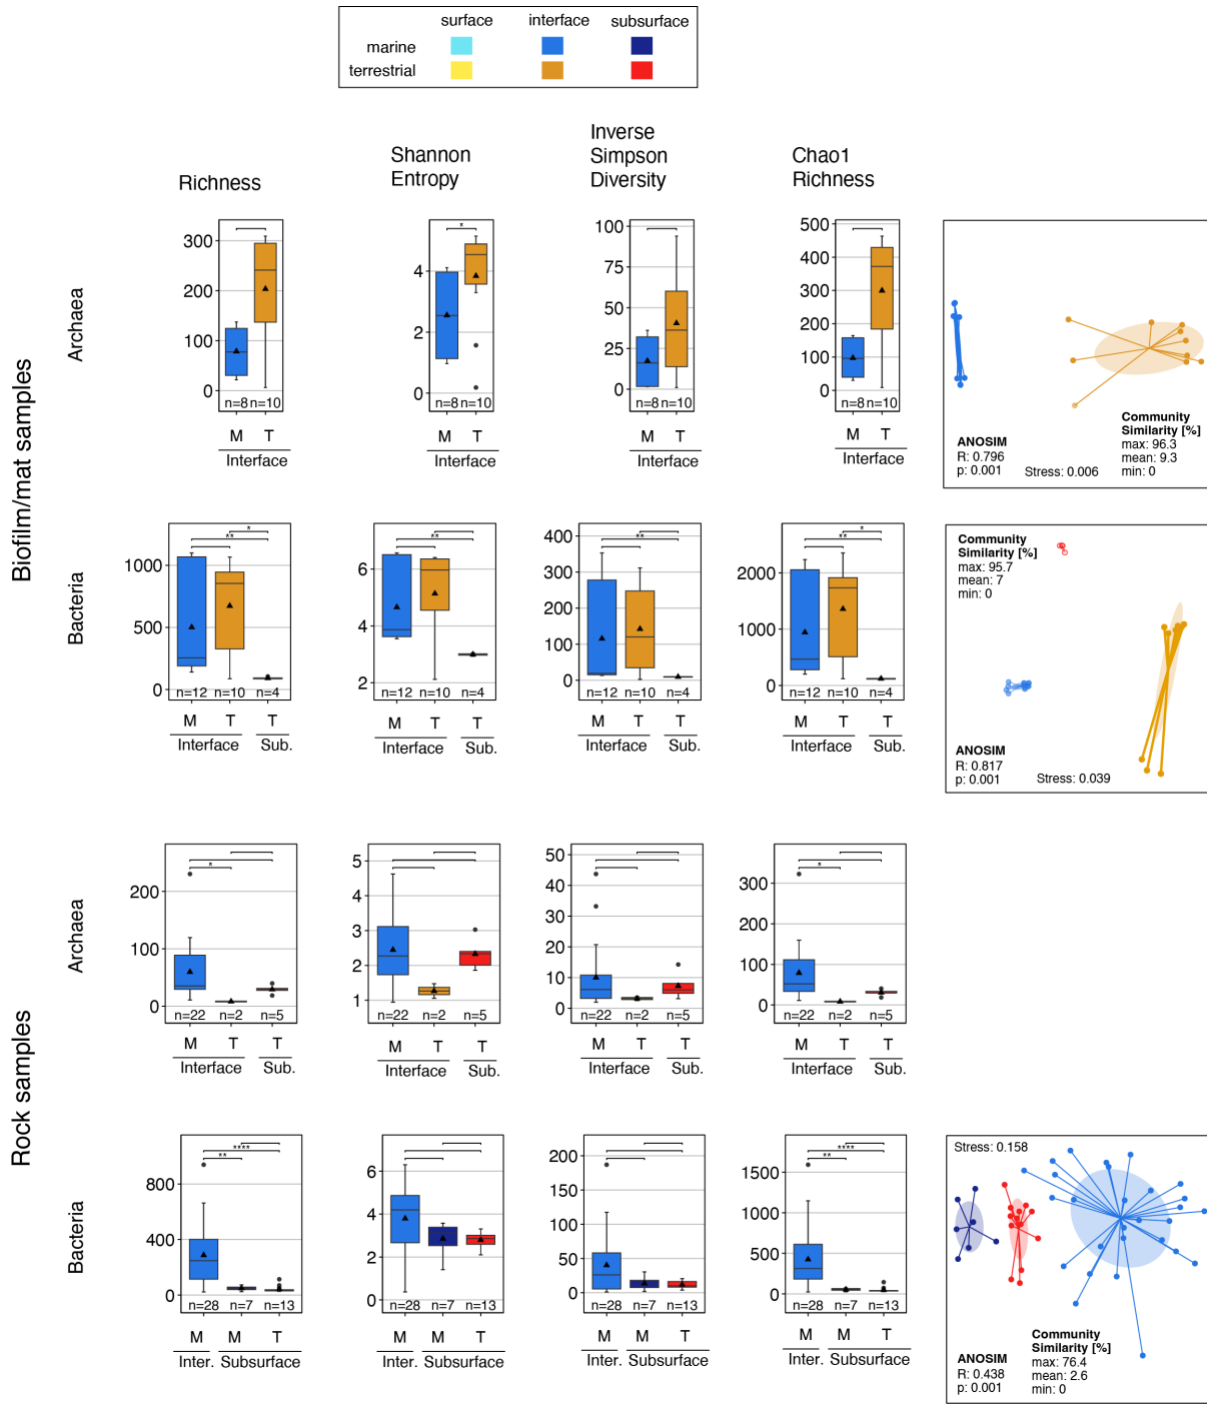

**Figure S5: Archaeal and bacterial diversity in biofilm and rock samples grouped based on biomes and depth realms.** The analyses of different sample materials from the depth realms shows similar trends as the overall analysis of depth realms. Note: Not all materials were available for all depth realms, boxplots are shown for consistency even for groups with very small sample numbers n, and an NMDS ordination for archaeal communities on rocks was omitted due to a stress value of near zero.

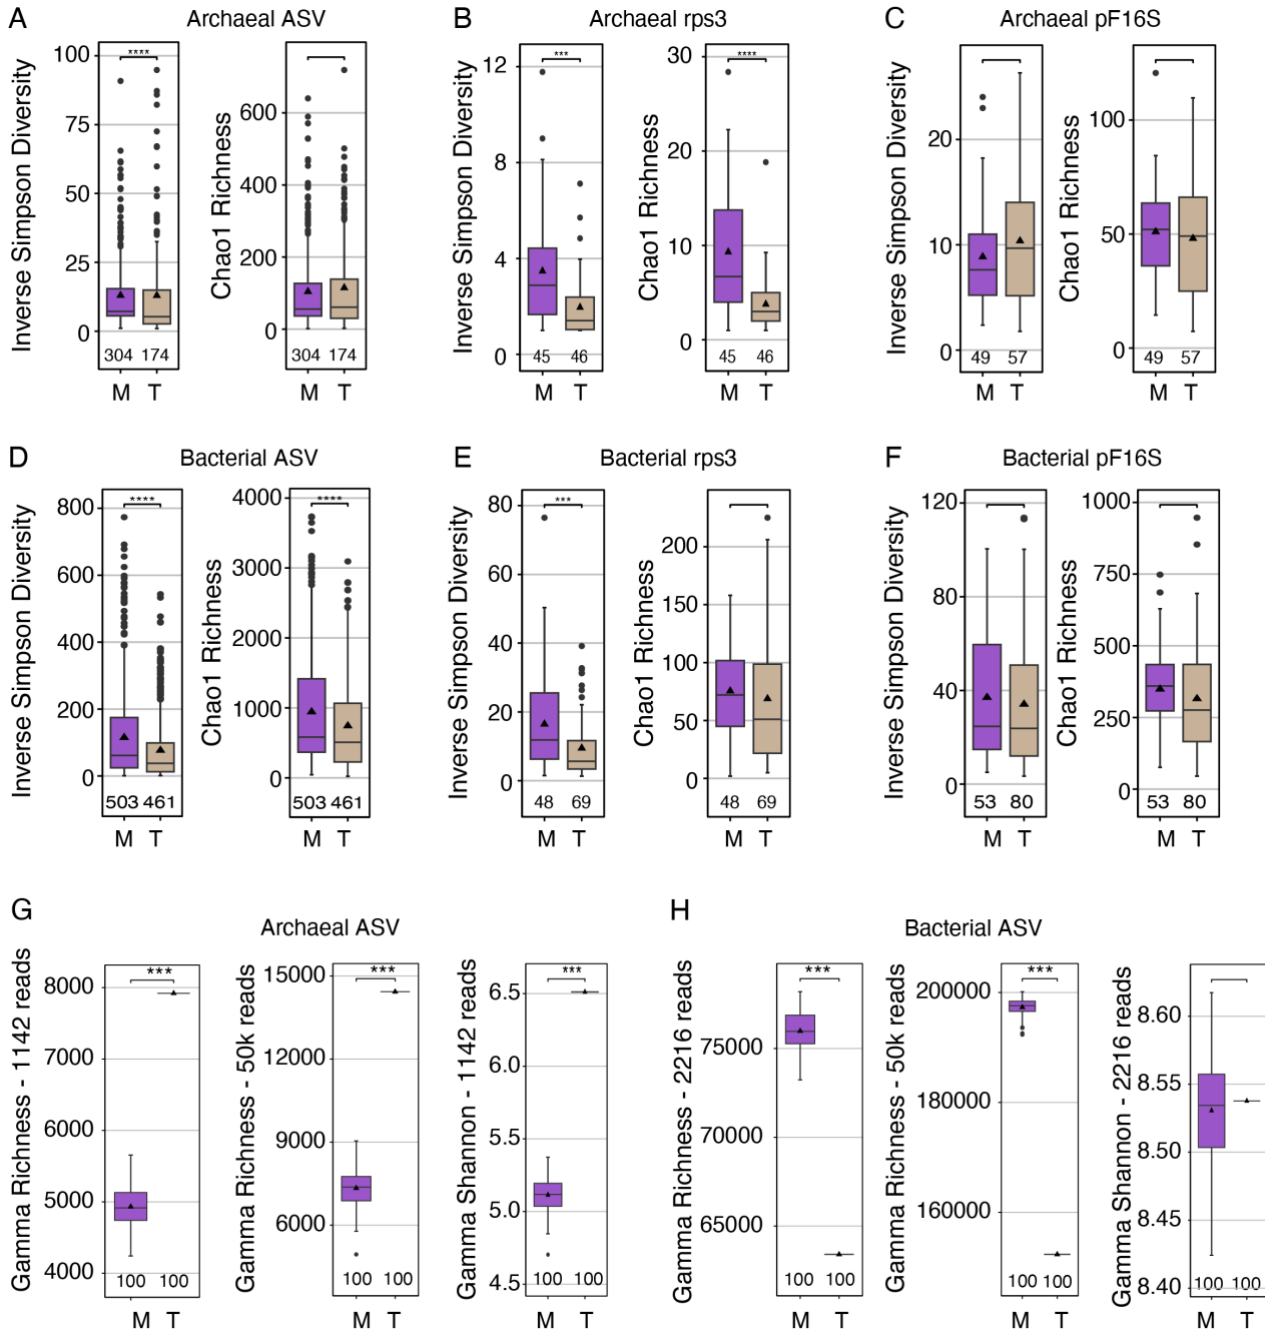

**Fig. S6: Microbial diversity indices.** Archaeal (A-C) and bacterial (D-F) alpha diversity (per sample community evenness and estimated richness) in marine (M) and terrestrial (T) microbiomes using 16S rRNA gene amplicon sequence variants (ASV; A, D), as well as metagenome-derived ribosomal protein S3 genes (rpS3; B, E) and 16S rRNA gene sequences detected by phyloFlash (pF16S). Archaeal and bacterial community evenness (inverse Simpson diversity) and estimated richness (Chao1) is similar or higher in marine biomes than in terrestrial biomes in all three methods. Total archaeal (G) and bacterial (H) diversity (gamma diversity) shown as richness and Shannon based on two subsampling approaches. Using 1142 (archaea) or 2271 (bacteria) reads includes all samples, while subsampling with 50000 reads disregards all samples with less than 50k reads. Archaeal gamma diversity is higher in terrestrial biome while bacterial gamma diversity is higher in the marine biome.

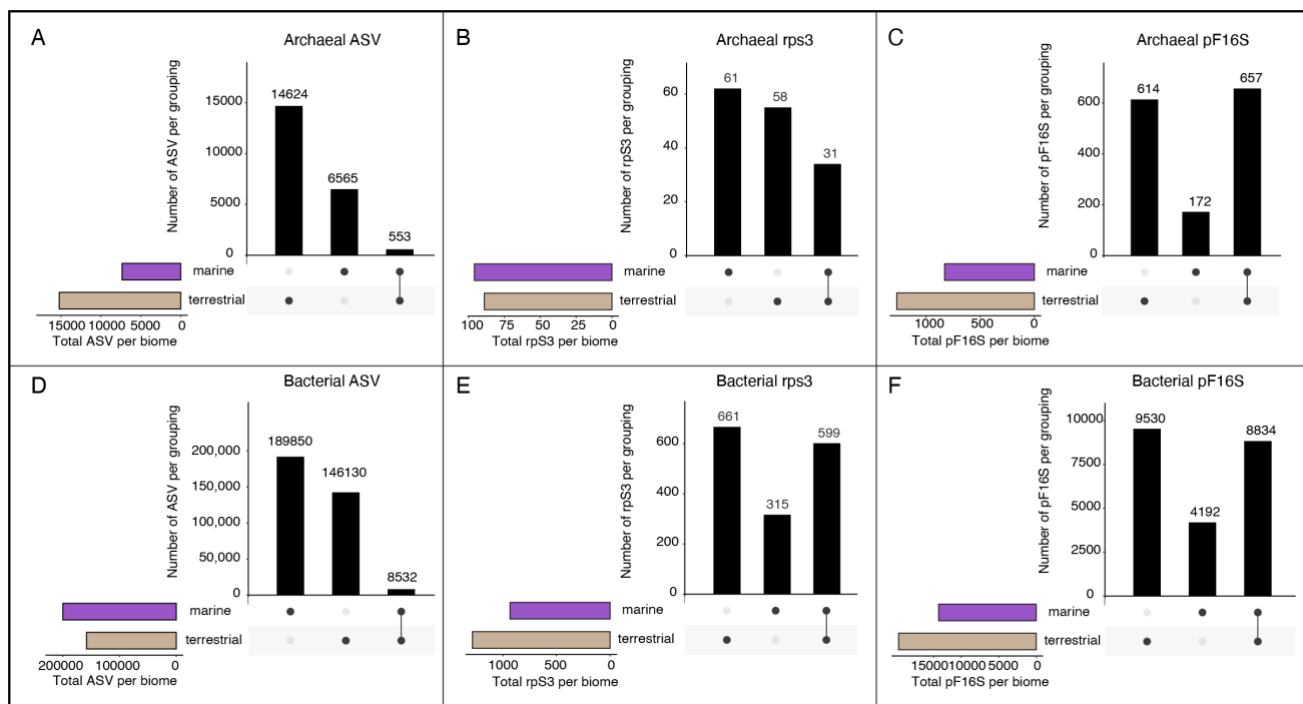

**Fig. S7: Community overlap.** Upset plots of archaeal (A-C) and bacterial communities (D-F) in marine and terrestrial microbiomes using 16S rRNA gene amplicon sequence variants (ASV; A, D), metagenome-derived ribosomal protein S3 genes (rpS3; B, E) and 16S rRNA gene sequences detected by phyloFlash (pF16S). The plots depict the same information as Venn diagrams and show how many unique sequences (ASV, rpS3, or pF16S) exclusively occur in a group or grouping (vertical bars). The total number of unique sequences in a group (gamma diversity) is shown as horizontal bars. For example, in panel A, the total number of archaeal ASV is higher in terrestrial ecosystems (light brown bar) than in marine biomes (purple bar). Within terrestrial biomes 14624 ASV occur exclusively there (first vertical bar), 6565 occur exclusively in marine biomes, and only 553 are shared between both biomes. The ASV data for panel A and D was subsampled, *i.e.*, corrected for the different number of datasets from each biome, to allow direct comparison between biomes.

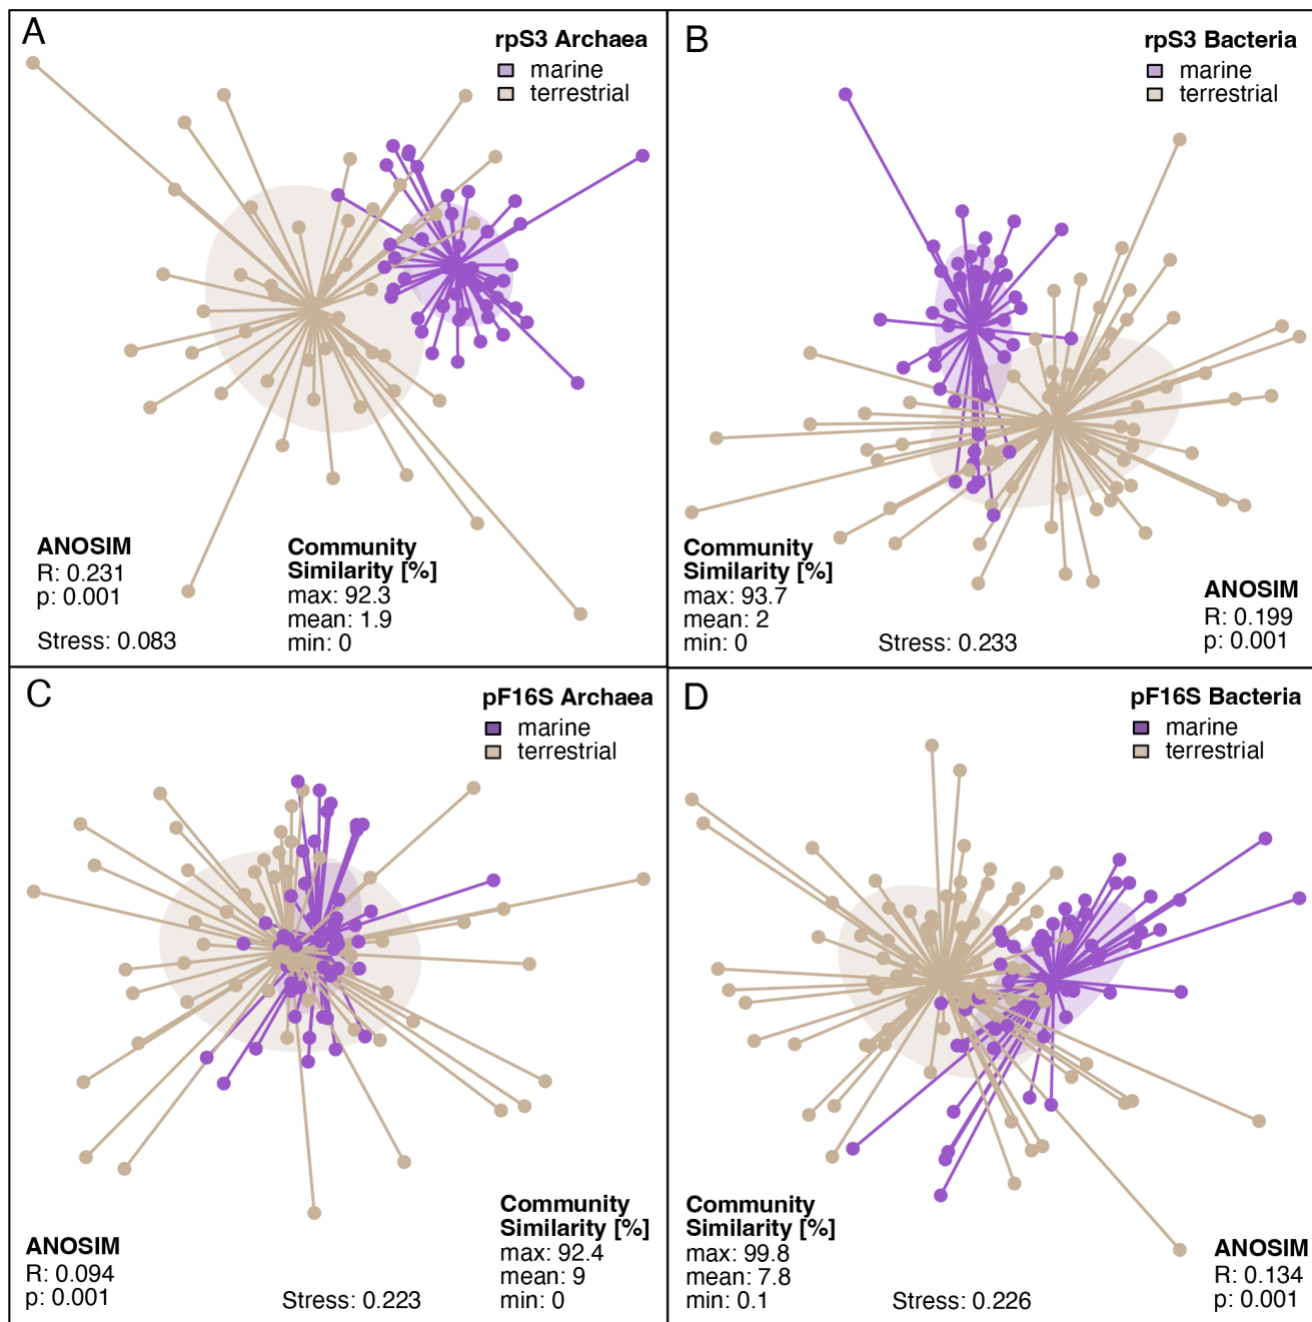

**Fig. S8: Community structure in marine and terrestrial biomes.** Plots are based on archaeal (A) and bacterial rpS3 genes (B) as well as on archaeal (C) and bacterial metagenome-derived 16S rRNA genes (pF16S; D). Apart from archaeal pF16S, the biomes show a rather small overlap, corroborating the substantial differences seen with ASV analyses, which is striking given that metagenomes are not ideal in detecting community diversity and structure, but rather useful for investigating the most abundant populations.

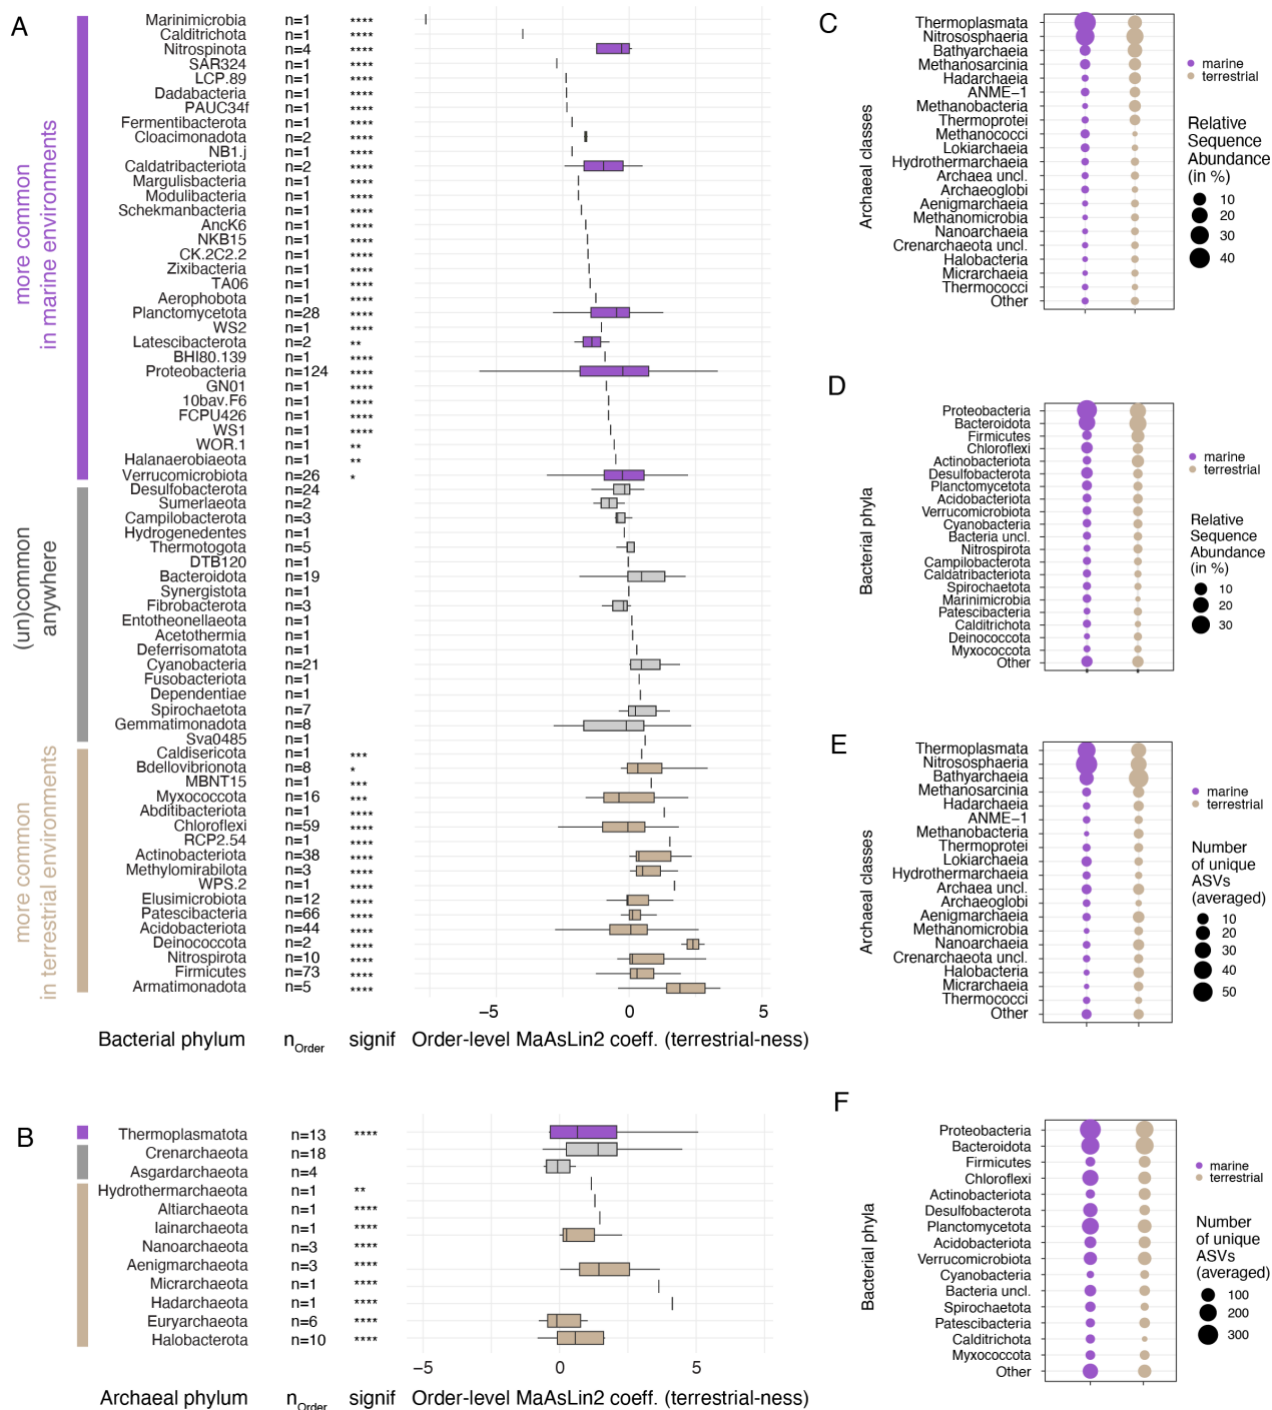

**Fig. S9: Abundance analyses of marine vs terrestrial lineages.** Differential abundance analysis of bacterial (A) and archaeal (B) phyla. The phyla are ordered from top to bottom based on increasing phylum level MaAsLin2 coefficient, *i.e.* likelihood of their occurrence in terrestrial-derived samples (“terrestrial-ness”). Boxplots summarize MaAsLin2 coefficients, *i.e.*, “terrestrial-ness”, of orders within the listed phyla. Note: due to ease of visualization boxplots are also shown for very small number ( $n$ ) of orders; phyla and orders are based on the SILVA reference tree. The significance of this occurrence is shown in the column denoted “signif”. Significance levels are: \*:  $p < 0.05$ , \*\*:  $p < 0.01$ , \*\*\*:  $p < 0.001$ , \*\*\*\*:  $p < 0.0001$ . Phyla in brown are found significantly more often in the terrestrial biome, while phyla in purple are found significantly less often in the terrestrial biome, *i.e.*, occur more often in the marine biome. The analysis was done using MaAsLin2 on phylum and order level (86). Relative abundance of archaeal classes (C) and bacterial phyla (D) found in marine and terrestrial biome (C). The 20 most abundant classes are shown, remaining classes are shown as “Other”. (D) Total number of unique ASVs found in respective classes (E) and phyla (F).

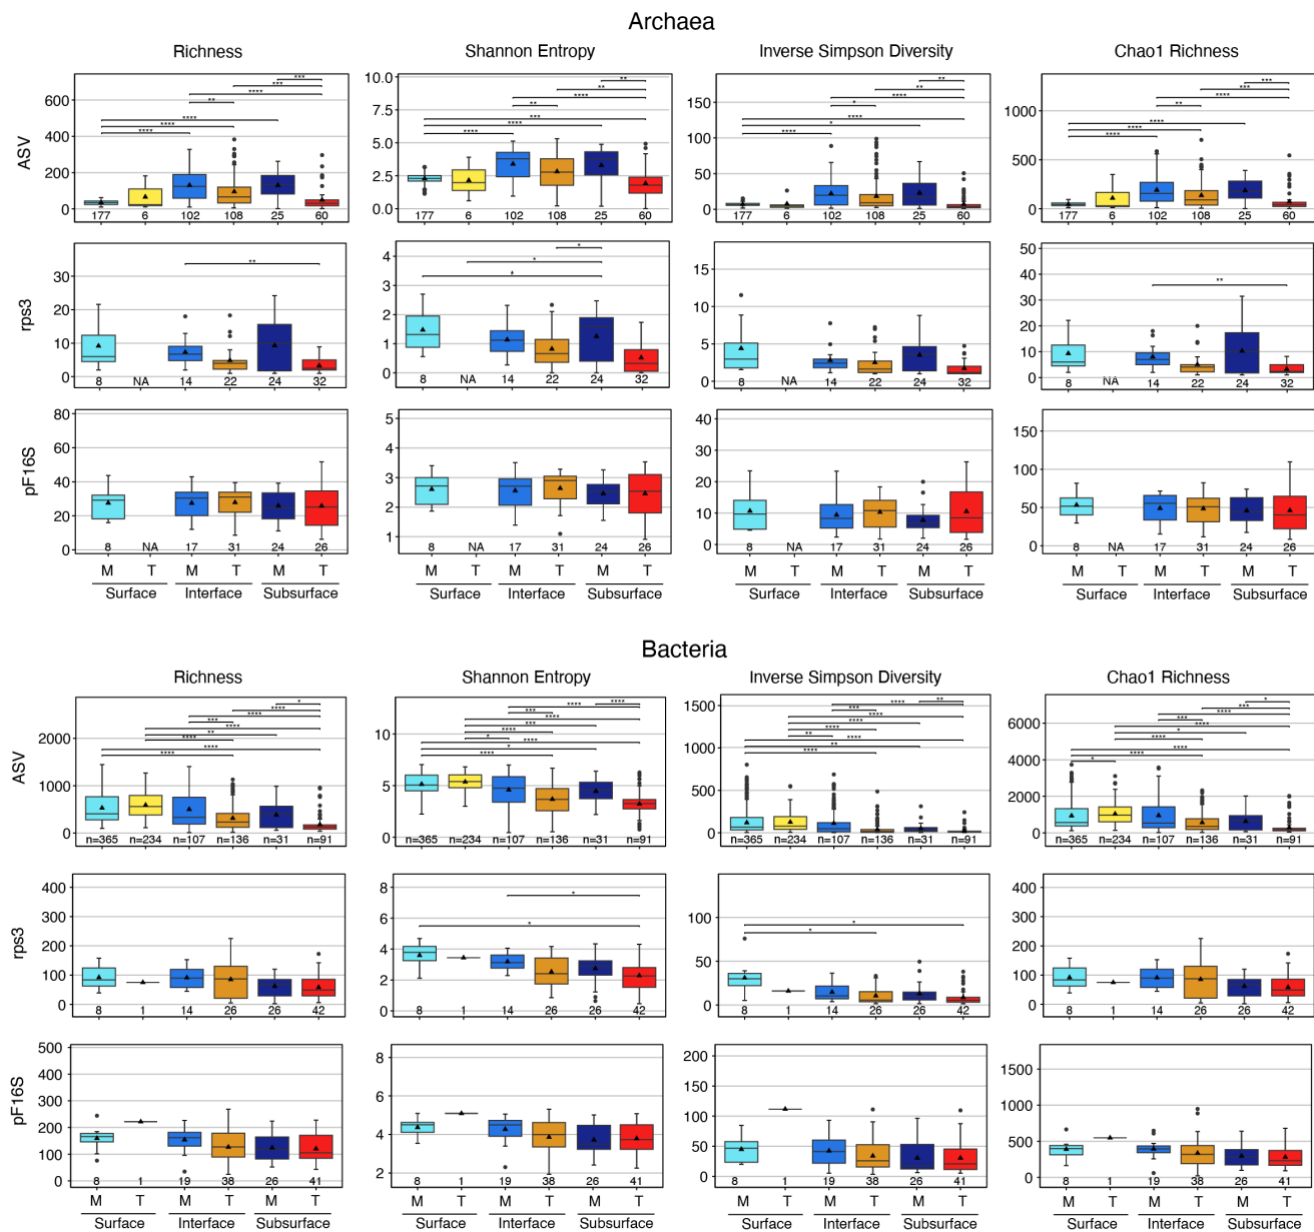

**Fig. S10: Alpha diversity indices.** Alpha diversity of archaeal (A-D) and bacterial communities (E-H) in sequencing datasets from marine (M) and terrestrial (T) surface, interface, and subsurface ecosystems. Columns show four major diversity indices (observed richness, Shannon Entropy, Inverse Simpson Diversity and Chao1 estimated richness), rows show which data was used to calculate diversity indices (metabarcoding-derived 16S amplicon sequence variants – ASVs, metagenome-derived rps3 genes, and metagenome-derived 16S rRNA gene reads mapped to a reference tree using phyloFlash – pF16S). The number (n) of used samples for each category is shown. Significance was tested using a Wilcoxon rank sum test, significance values are: \*:  $p < 0.05$ ; \*\*:  $p < 0.01$ ; \*\*\*:  $p < 0.001$ ; \*\*\*\*:  $p < 0.0001$ . p values were corrected using the Bonferroni method. Note: Shannon and Simpson indices are relatively independent of the total number of ASVs analyzed. The presented values derive from an analysis of 2000 subsampled reads per sample but are basically indiscernible from an analysis using 50000 reads per sample (Fig. S11). In contrast, the number of observed ASVs (richness) does change with the number of subsampled reads analyzed, however the relative differences between groups are retained. Almost all pairs that were significantly different were between biomes, very few within biomes, corroborating the great differences between marine and terrestrial communities.

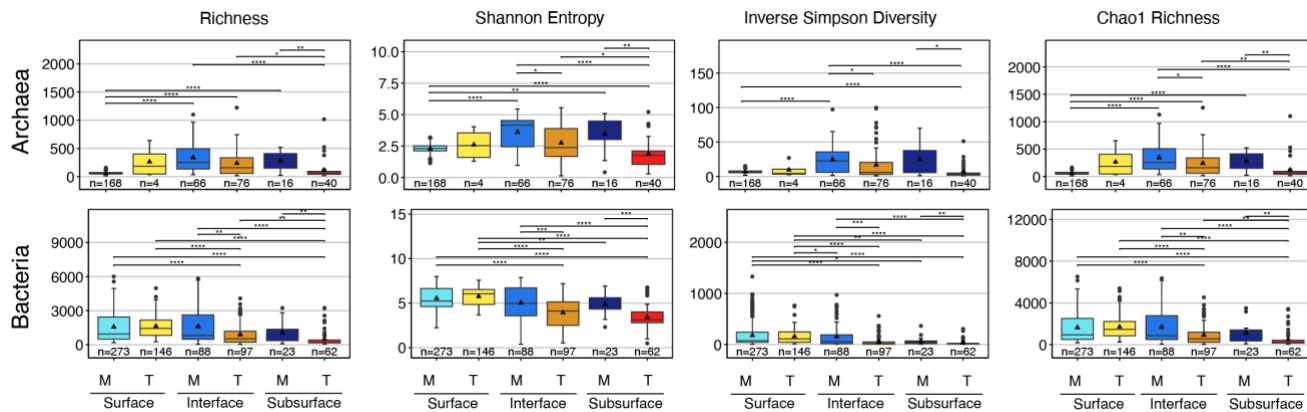

**Fig. S11: Alpha diversity indices of subsampled data.** To investigate the influence of subsampling on alpha diversity we used a very conservative cutoff using only samples that had at least 50000 archaeal or bacterial randomly chosen reads per sample. The difference in number of samples per group (n) to the ASV rows in Fig. S10 is due to samples that had less than 50000 archaeal or bacterial reads and were thus discarded. Overall trends in alpha diversity and significant differences between groups were very similar to the results obtained by analyzing 1142 archaeal and 2216 bacterial reads, the cutoff that was used for all other analyses.

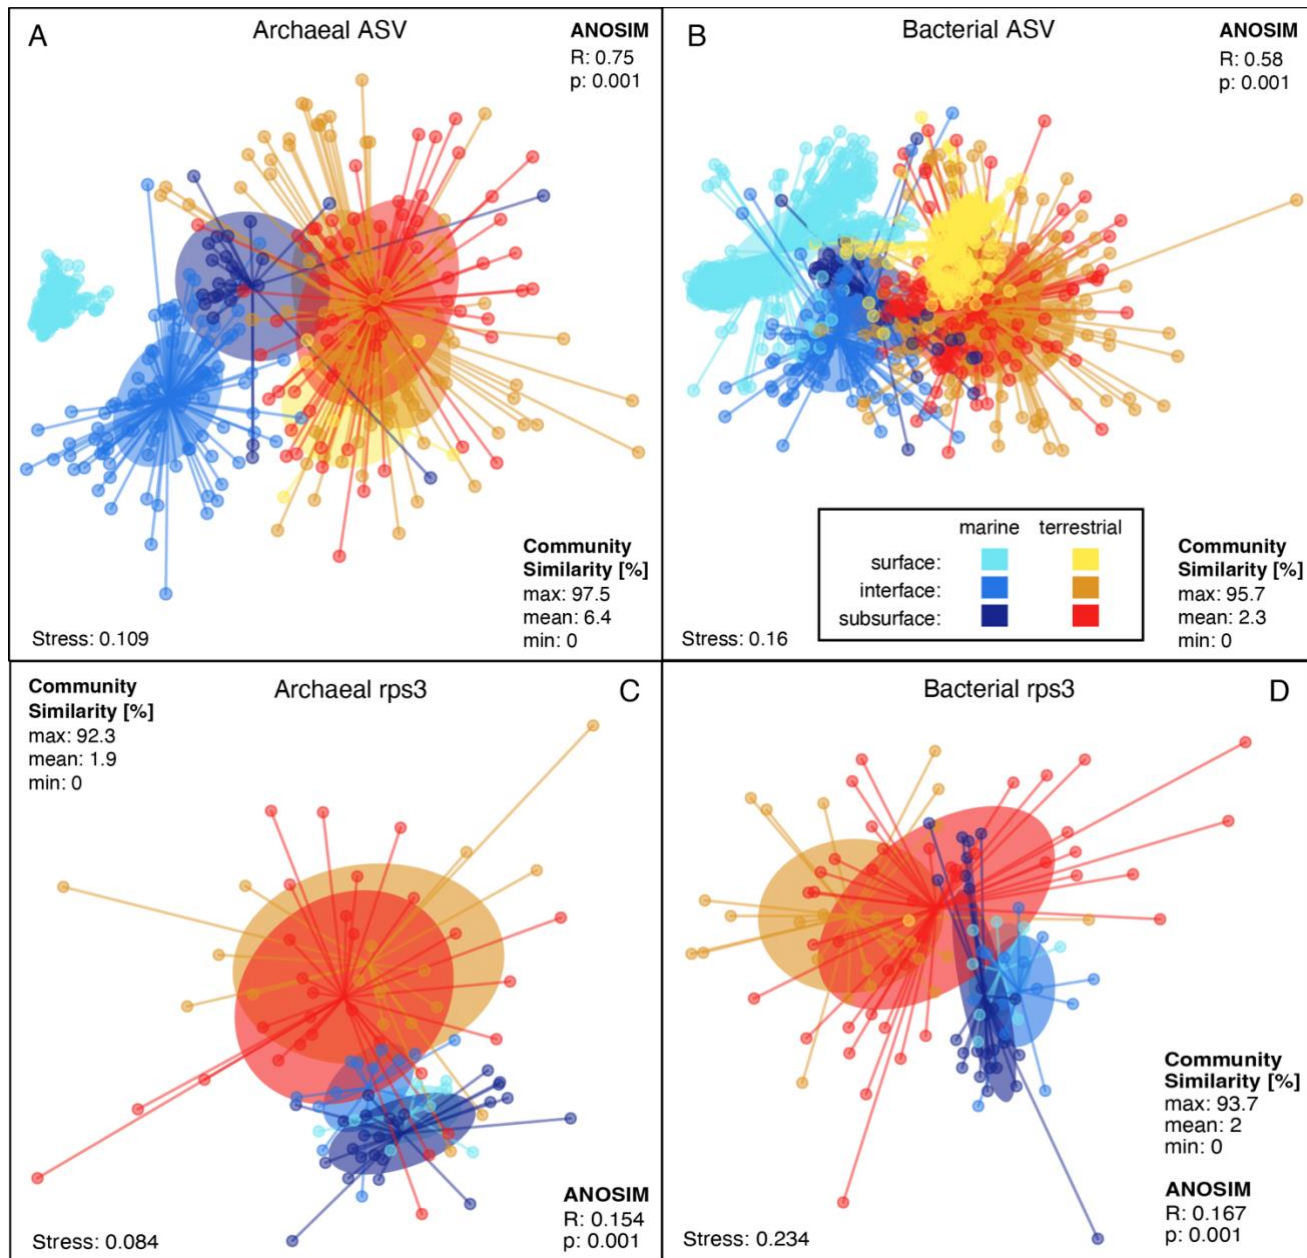

**Fig. S12: Microbial beta diversity.** Non-metric multidimensional scaling (NMDS) of archaeal (A, C) and bacterial (B, D) communities based on amplicon sequence variants (A, B) and rps3 genes (C, D). Each dot represents the microbial community structure of a sample, colors represent six groups – three depths in both biomes. The plots show 469 archaeal amplicon datasets (37 projects, A), and 1105 bacterial amplicon datasets (51 projects, B), 91 archaeal rps3 (C), and 117 bacterial rps3 gene datasets (D). In A and B, the groups are overlapping, yet significantly different based on an Analysis of Similarity (ANOSIM). The separation between groups in A and B is easier to visualize in a 3-dimensional space, for this we have calculated and animated a 3D-NMDS (Video S1, S2) visualizing that each of the ecosystem types harbored distinct archaeal (ANOSIM:  $R=0.63$ ;  $p=0.001$ ) and bacterial communities (ANOSIM:  $R=0.54$ ;  $p=0.001$ ). In C and D, the groups are overall not significantly different, however the clear separation of the centroids, *i.e.* the average within-group distances, and ellipses (depicting 1 standard deviation from the centroid) corroborate the ASV-based trend. Community differences are particularly clear in marine vs terrestrial realms, *e.g.*, the blue (marine interface) and orange (terrestrial interface) ellipses, or the dark blue (marine subsurface) and red (terrestrial subsurface) ellipses hardly overlap, suggesting very distinct communities in these realms.

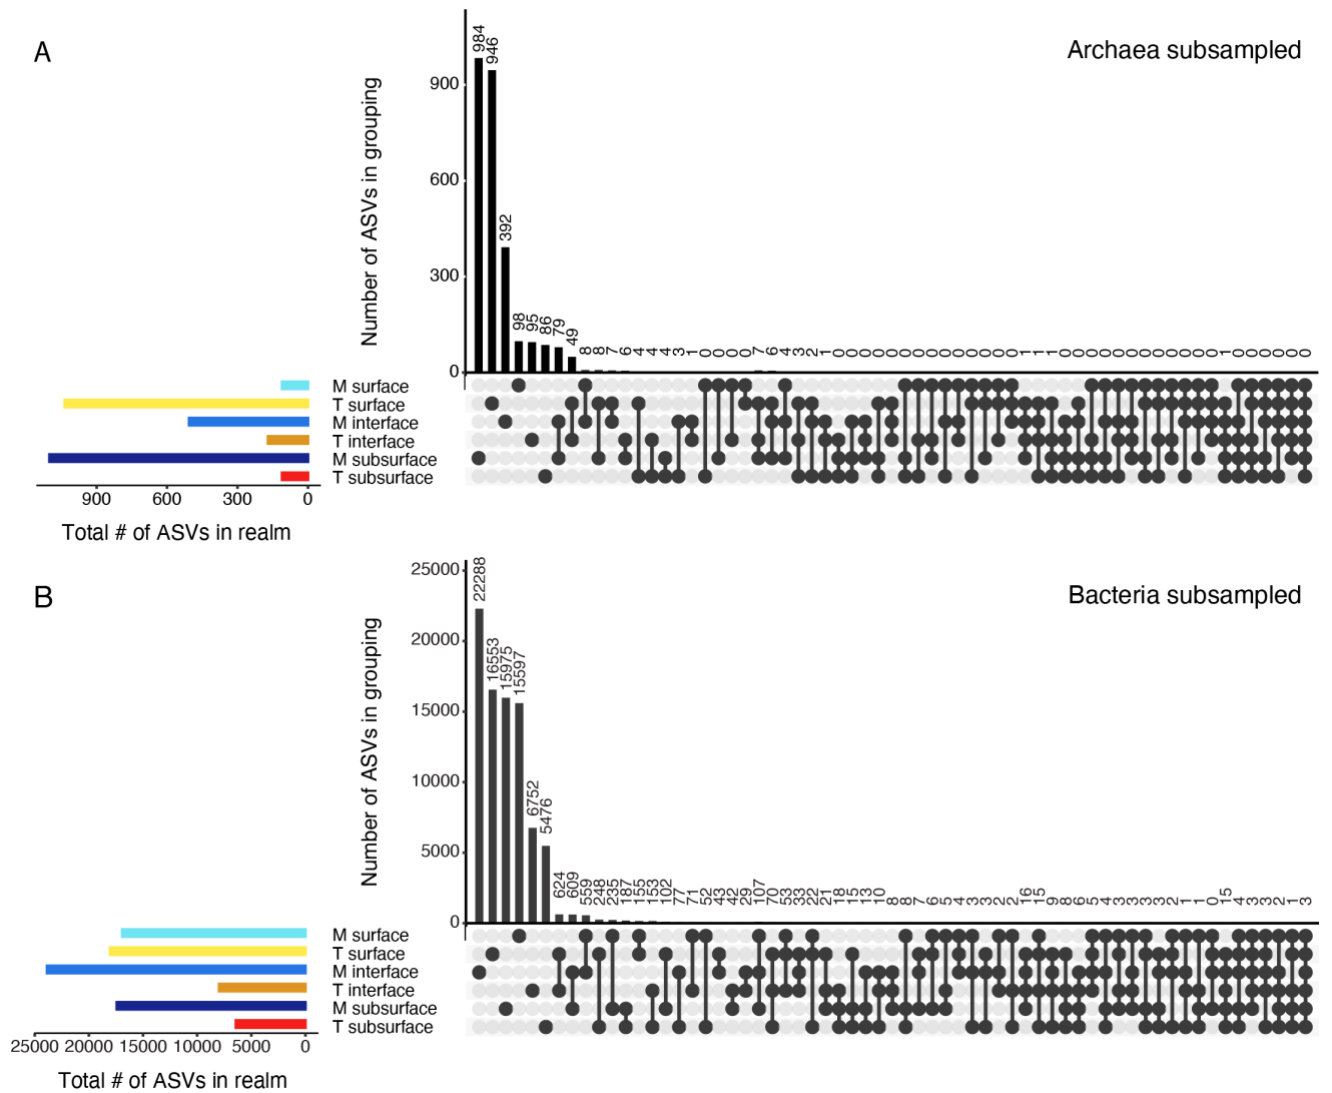

**Fig. S13: Community overlaps between analyzed biomes and depth realms.** Upset plots show subsampled archaeal (A) and bacterial communities (B). Subsampling was done to account for different numbers of samples per group and thus resulting unequal sampling effort. The plots depict the same information as Venn diagrams and show how many amplicon sequence variants (ASV) exclusively occur in a group or grouping (vertical bars). The total number of ASV of a group (gamma diversity) is shown as horizontal bars. For example, the highest number of total archaeal ASV in the subsampled dataset is found in marine subsurface environments. This group contains more than 1000 archaeal ASVs in total (gamma diversity, dark blue horizontal bar in A) of which 984 archaeal ASV occur exclusively in this group (1st vertical bar in A). Another example, there are 624 bacterial ASV that occur exclusively in terrestrial surface AND interface datasets, but nowhere else (7<sup>th</sup> vertical bar in B), this is depicted by the two connected black dots in the 2<sup>nd</sup> and 4<sup>th</sup> row. Archaeal and bacterial richness is decreasing with depth in terrestrial environments, but in marine environments richness is similar across depth for bacteria and even increasing with depth for archaea. Corroborating the trends seen with alpha diversity indices, and NMDS plots, it is clear from the upset plots that more ASVs are shared between realms of the same biome than between biomes.

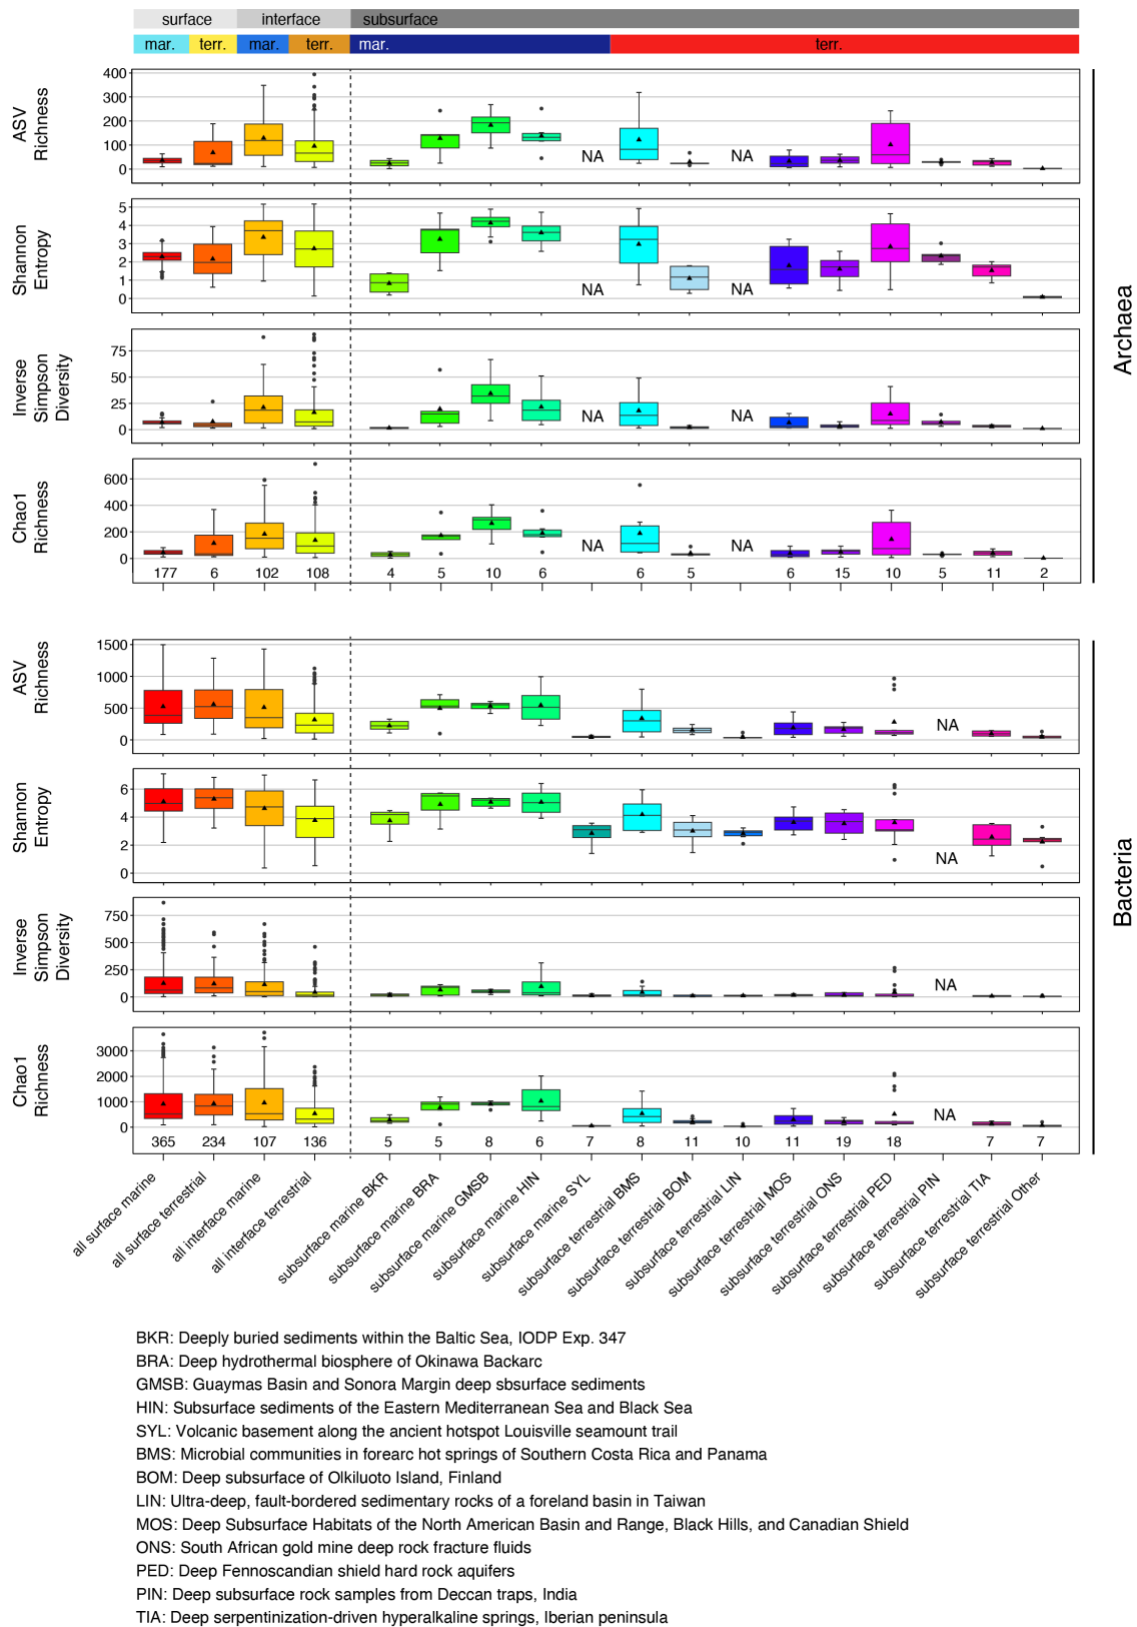

**Fig. S14. Observed archaeal and bacterial diversity in individual CoDL projects.** Archaeal and bacterial alpha diversity found in individual marine and terrestrial CoDL projects compared to bulk marine and terrestrial surface and interface realms. Three terrestrial projects with less than 5 samples are grouped as “Other” (n: number of included samples).

Archaea

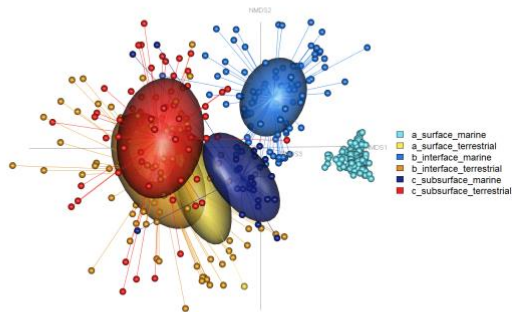

Bacteria

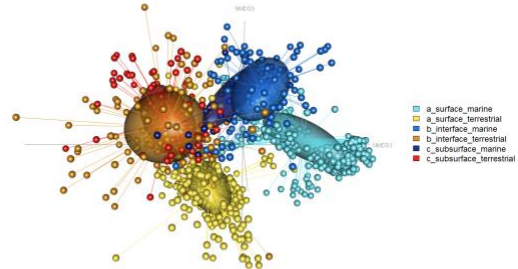

---

**Movie S1, S2: Video-animated three-dimensional non-metric multidimensional scaling.** Ordination of archaeal (Video S1) and bacterial community structure (Video S2) based on 16S rRNA gene amplicon sequence variants (ASVs). Each dot is one sample, dot size represents Shannon entropy. The spheres depict the volume enclosing one standard deviation from the weighted average mean of within-group distances (centroid). Each sample is connected to the centroid of the group it belongs to.

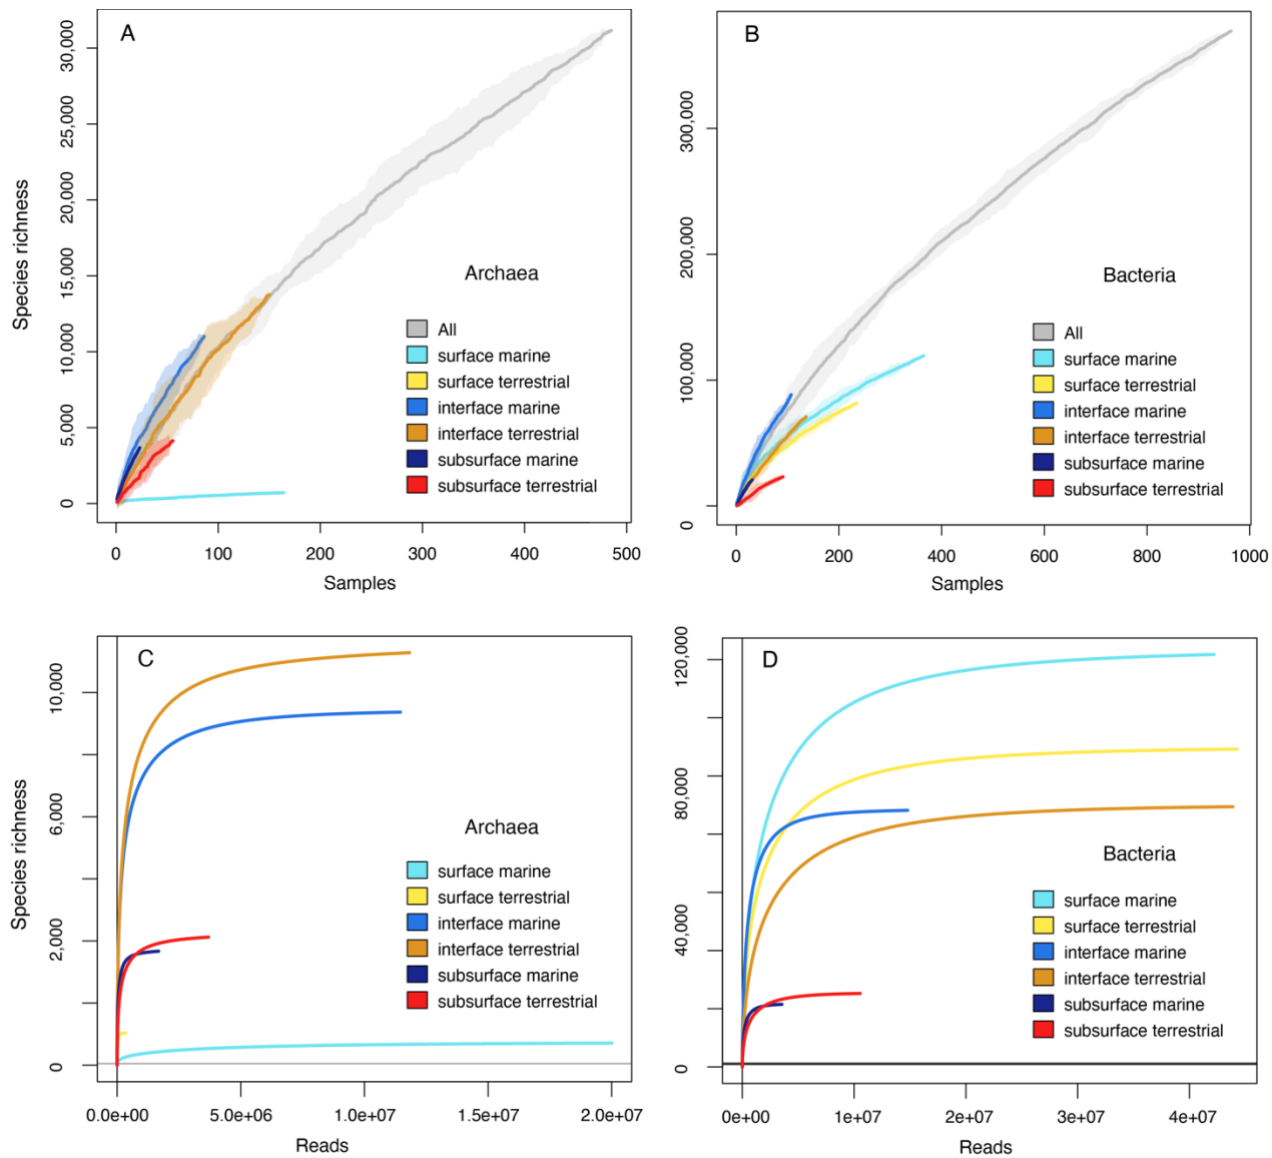

**Figure S15: Species accumulation and rarefaction curves based on 16S rRNA gene amplicon sequence variants (ASV).** All archaeal (A) and bacterial (B) accumulation curves, except those of archaeal marine surface samples, show a steep slope. This means that we can expect to find many more species-level clades (ASVs) in all these environments. Global microbial diversity is far from being exhaustively sampled. Using a read-based rarefaction the archaeal (C) and bacterial (D) curves of all groups reach a plateau. Taken together this indicates that the sequencing depth was sufficient to detect all "species" in the presently studied sites/samples, but that more "species" await discovery if more sites are investigated.

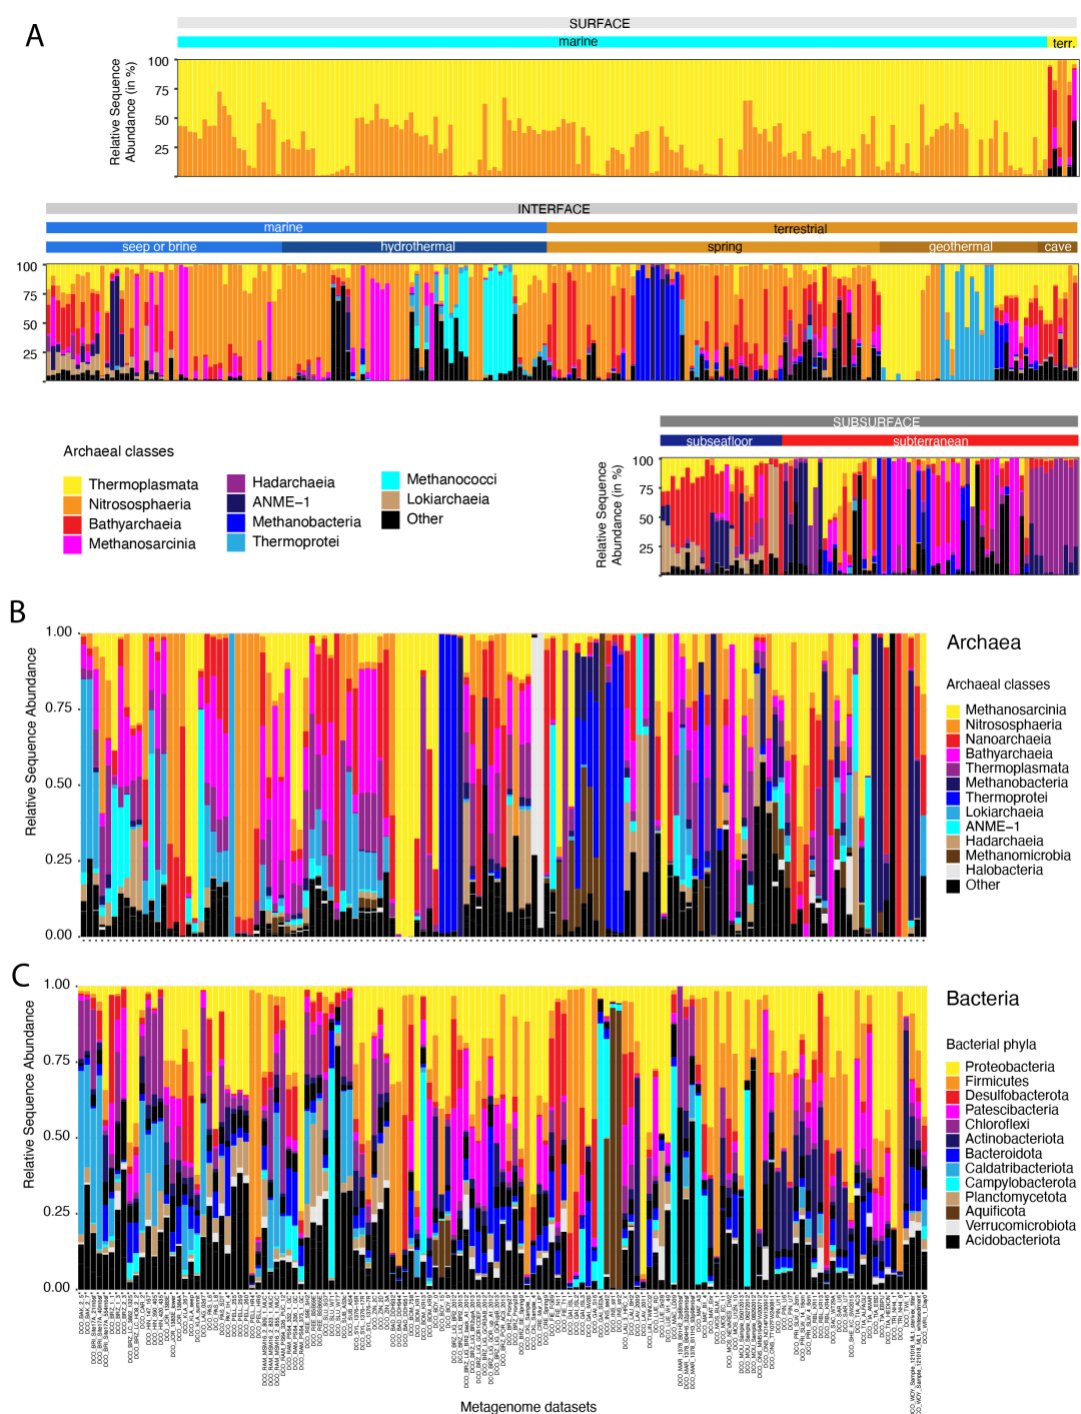

**Fig. S16: Archaeal class-level composition across all samples and phyloFlash-based community composition in metagenomes.** (A) Each bar represents one sample and shows the relative sequence abundance of the top 10 most abundant archaeal classes. All remaining classes are summed and shown as “Other”. Relative sequence abundances are based on the subsampled ASV  $\times$  Sample table that was used for all community analyses. The samples are grouped by depth, biome, and environments (vertical bars above) and ordered analogous to Fig. 3. The bottom panels show the 12 most sequence abundant archaeal classes (B) and bacterial phyla (C) as found in the subsurface metagenomes with a short read mapping approach using phyloFlash.

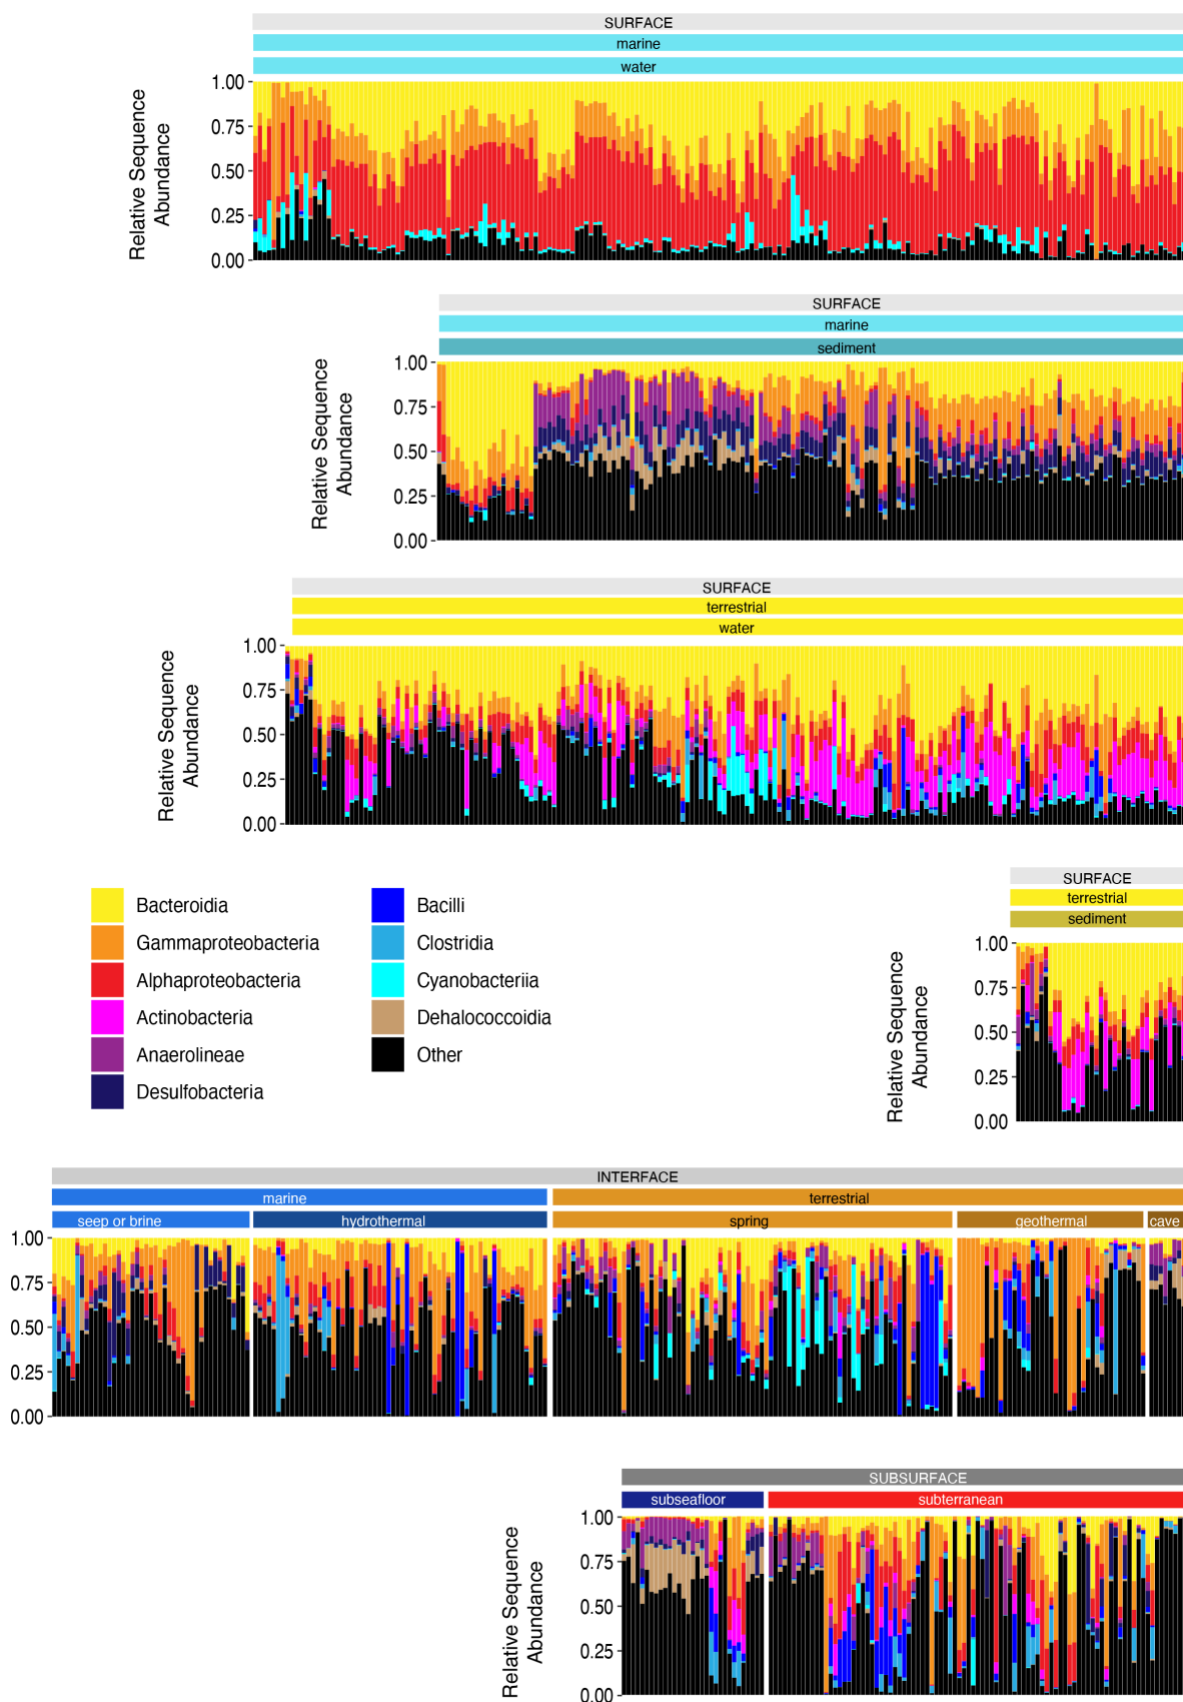

**Fig. S17: Bacterial class-level composition across all samples.** Each bar represents one sample and shows the relative sequence abundance of the top 10 most abundant bacterial classes. All remaining classes are summed and shown as “Other”. Relative sequence abundances are based on the subsampled ASV  $\times$  Sample table that was used for all community analyses. The samples are grouped by depth, biome, and environments (vertical bars above) and ordered analogous to Fig. 3.

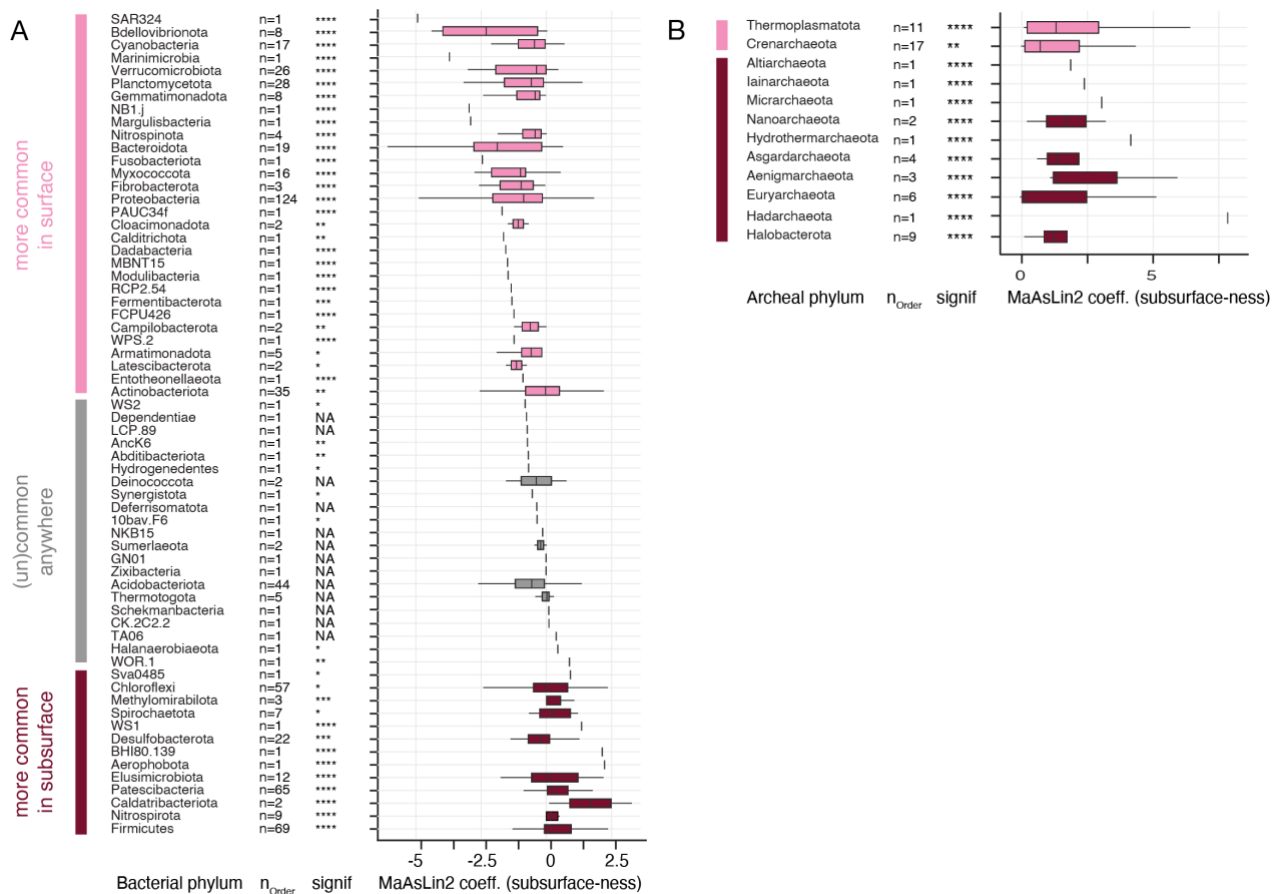

**Fig. S18: Differential sequence abundance analyses.** Analyses comparing the occurrence of bacterial (A) and archaeal (B) phyla in subsurface vs surface realms. The phyla are ordered from top to bottom based on increasing phylum level MaAsLin2 coefficient, *i.e.* likeliness of their occurrence in subsurface-derived samples (“subsurface-ness”). Boxplots summarize MaAsLin2 coefficients, *i.e.*, “subsurface-ness”, of orders within the listed phyla. Due to ease of visualization boxplots are even shown for very small number (*n*) of orders. The significance of this occurrence is shown in the column denoted “signif”. Significance levels are: \*:  $p < 0.05$ , \*\*:  $p < 0.01$ , \*\*\*:  $p < 0.001$ , \*\*\*\*:  $p < 0.0001$ . Phyla in pink are found significantly more often in the surface realm, while phyla in maroon are found significantly less often in the surface realm, *i.e.*, occur more often in the subsurface. Note: Association with a category does not necessarily mean that respective lineages are sequence abundant in either or both categories. In turn, a preferential occurrence, *e.g.*, in the surface, does not mean a clade is not abundant in the subsurface. *Bacteroidota* and *Crenarchaeota* for example are associated with the surface, yet they are very widespread and abundant also in the subsurface, just not quite as much and as prevalent. Thus, the broad trends suggested by the association analysis are especially useful and informative when interpreted in combination with the actual relative sequence abundances of the respective lineages (Fig. 4, 6, 8).

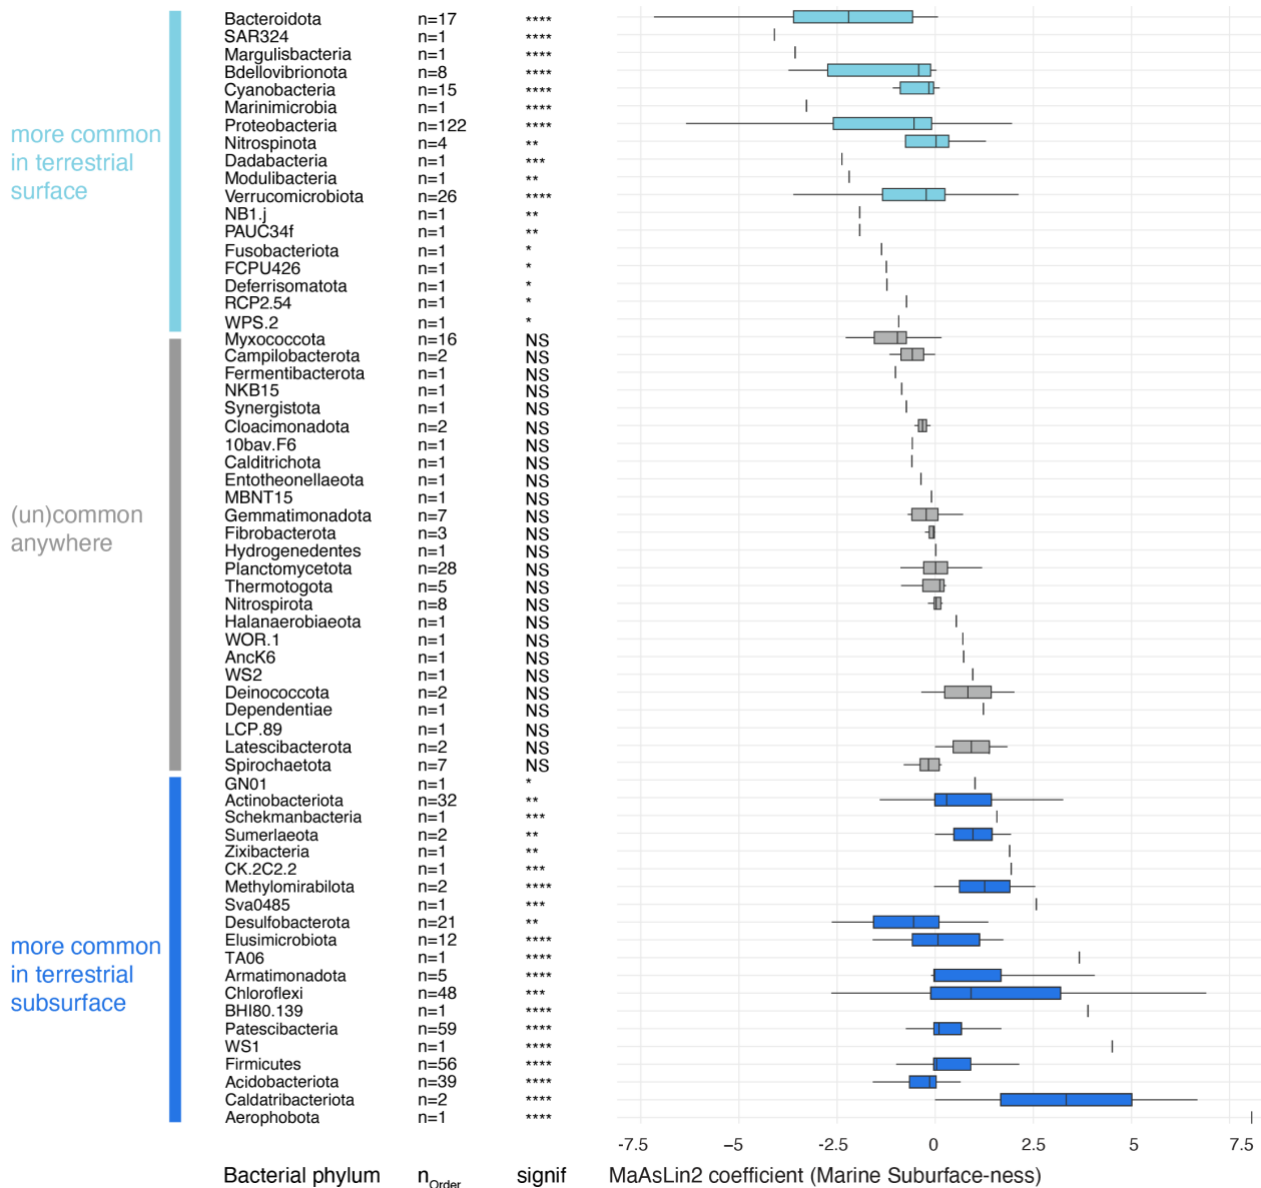

**Fig. S19: Abundance analyses of marine surface vs subsurface lineages.** Differential abundance analysis of bacterial phyla. The phyla are ordered from top to bottom based on increasing phylum level MaAsLin2 coefficient, *i.e.* likeliness of their occurrence in marine subsurface-derived samples (“marine subsurface-ness”). Boxplots summarize MaAsLin2 coefficients, *i.e.*, “marine subsurface-ness”, of orders within the listed phyla. Note: due to ease of visualization boxplots are also shown for very small number (n) of orders; phyla and orders are based on the SILVA reference tree. The significance of this occurrence is shown in the column denoted “signif”. Significance levels are: \*:  $p < 0.05$ , \*\*:  $p < 0.01$ , \*\*\*:  $p < 0.001$ , \*\*\*\*:  $p < 0.0001$ .

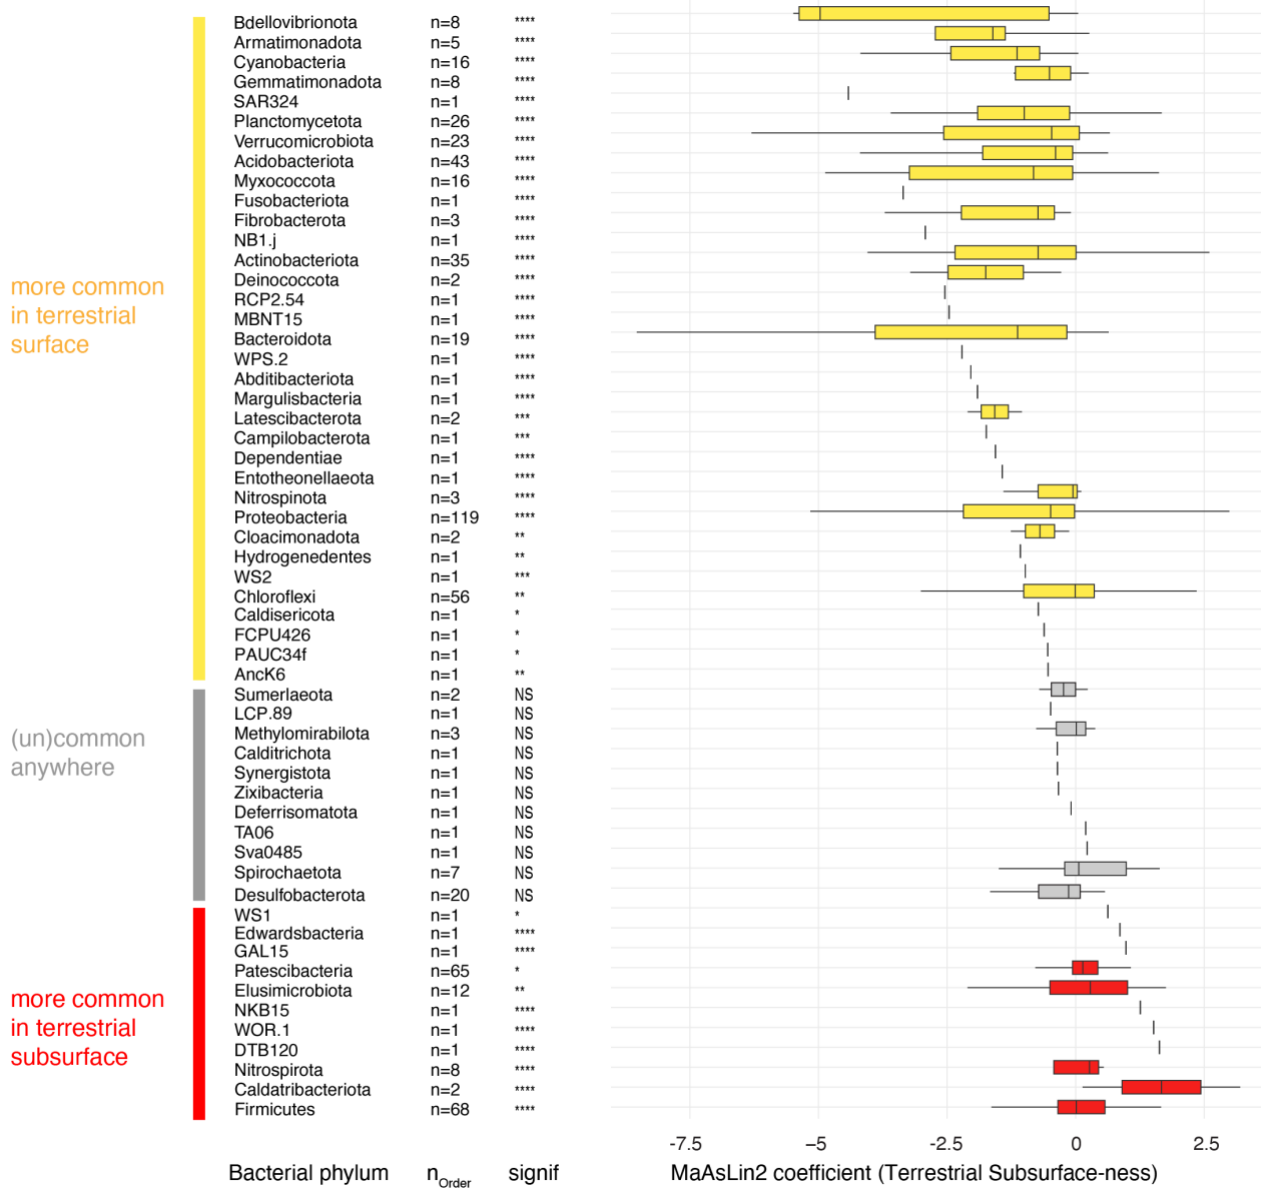

**Fig. S20: Abundance analyses of terrestrial surface vs subsurface lineages.** Differential abundance analysis of bacterial phyla. The phyla are ordered from top to bottom based on increasing phylum level MaAsLin2 coefficient, *i.e.* likeliness of their occurrence in terrestrial subsurface-derived samples (“terrestrial subsurface-ness”). Boxplots summarize MaAsLin2 coefficients, *i. e.*, “terrestrial subsurface-ness”, of orders within the listed phyla. Note: due to ease of visualization boxplots are also shown for very small number (*n*) of orders; phyla and orders are based on the SILVA reference tree. The significance of this occurrence is shown in the column denoted “signif”. Significance levels are: \*:  $p<0.05$ , \*\*:  $p<0.01$ , \*\*\*:  $p<0.001$ , \*\*\*\*:  $p<0.0001$ .

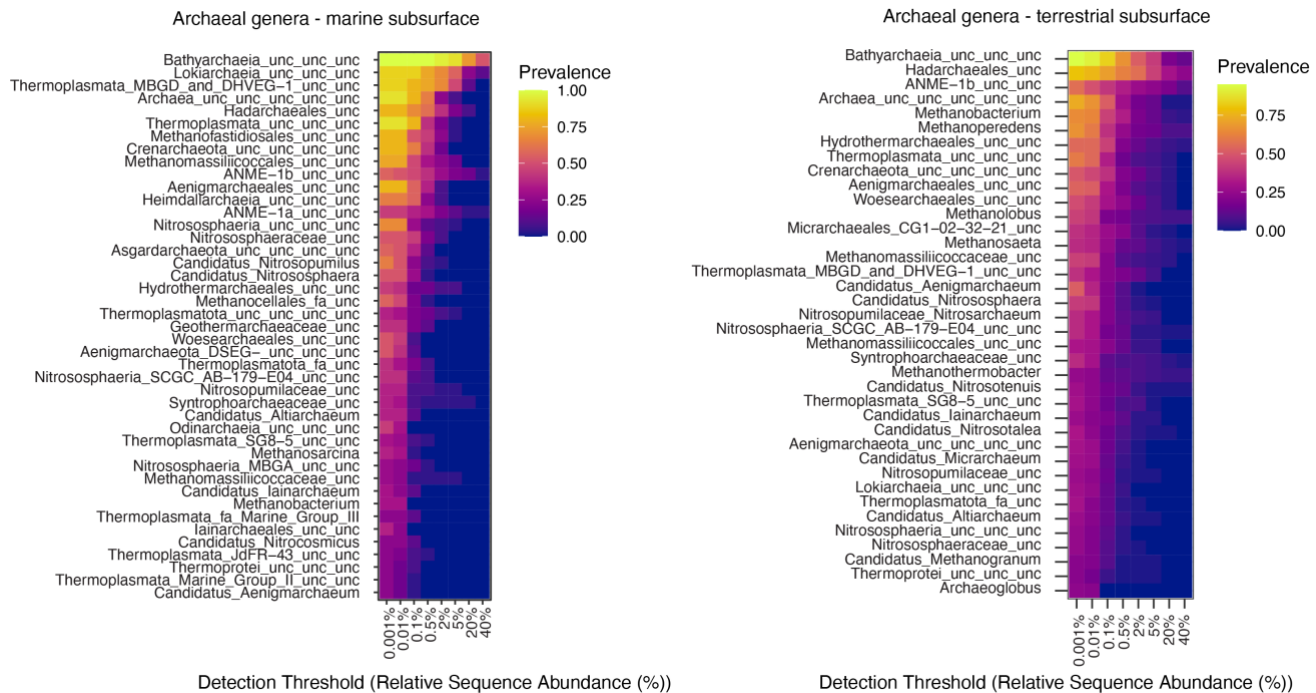

**Fig. S21. Subsurface archaeal genus-level core microbiomes.** The heatmaps show potential archaeal genus level core microbiomes in the marine and terrestrial subsurface, regarding their prevalence and relative sequence abundances. Lineages are shown as rows, each column color represents the lineages prevalence at a certain RSA threshold. Uncultured/unclassified lineages are denoted by “unc” and the closest known phylogenetic level or the closest phylogenetic level with an isolated representative is shown. For example, Bathyarchaeia uncl are all uncultured/unclassified/ genus level lineages in the class Bathyarchaeia, and thus likely condense many uncultured genera into one row.

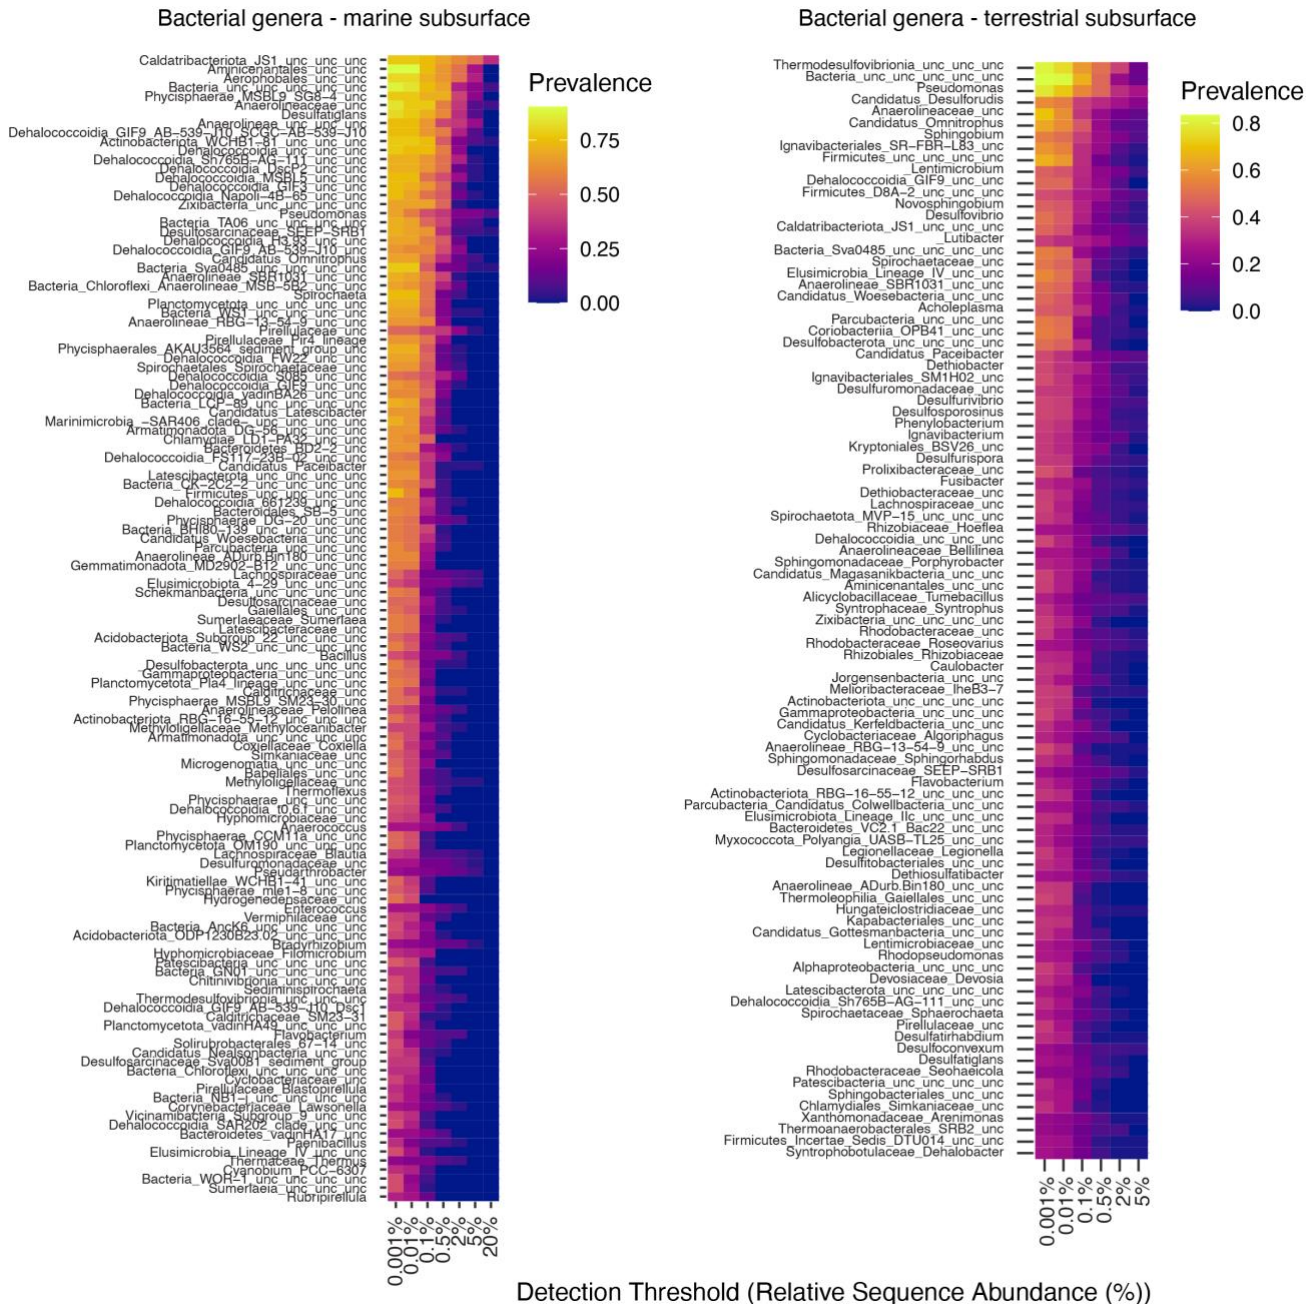

**Fig. S22. Subsurface bacterial genus-level core microbiomes.** The heatmaps show potential bacterial genus level core microbiomes in the marine and terrestrial subsurface, regarding their prevalence and relative sequence abundances. Lineages are shown as rows, each column color represents the lineages prevalence at a certain RSA threshold. Uncultured/unclassified lineages are denoted by “unc” and the closest known phylogenetic level or the closest phylogenetic level with an isolated representative is shown. For example, Caldatribacteria\_JS1 uncl are all uncultured/unclassified/ genus level lineages in the class Caldatribacteria\_JS1, and thus likely condense many uncultured genera into one row.

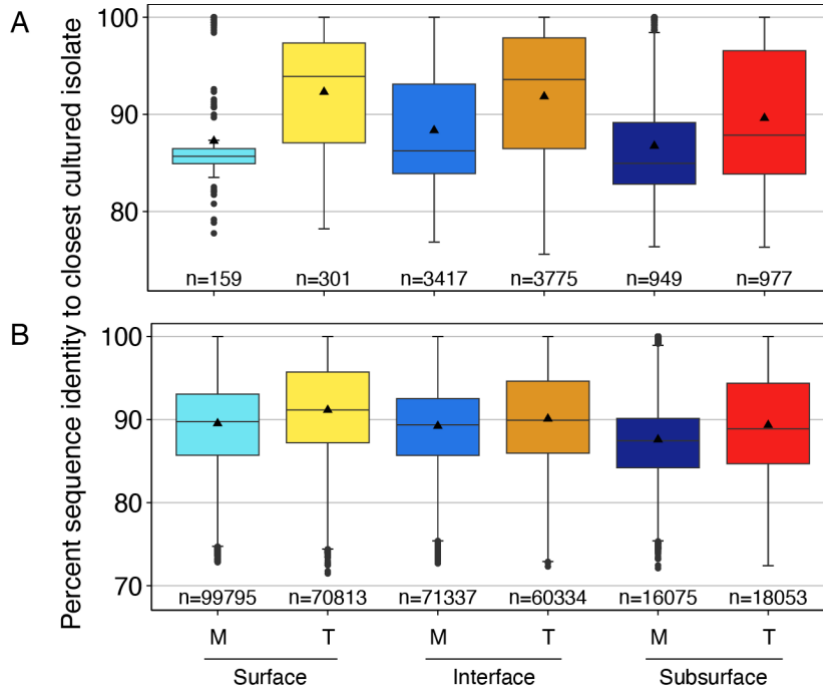

**Fig. S23: Phylogenetic novelty.** Summary of the percent identity values of n (below each boxplot) archaeal (A) and bacterial (B) amplicon sequence variants (ASVs) for the six studied realms. To determine the percent identity, each 16S rRNA gene amplicon was aligned to a database of cultured isolates. Every pairwise comparison was highly significant using a Wilcoxon rank sum test ( $p < 0.01$ ), except marine and terrestrial surface (archaea) and terrestrial interface and subsurface groups (archaea), significances not shown.

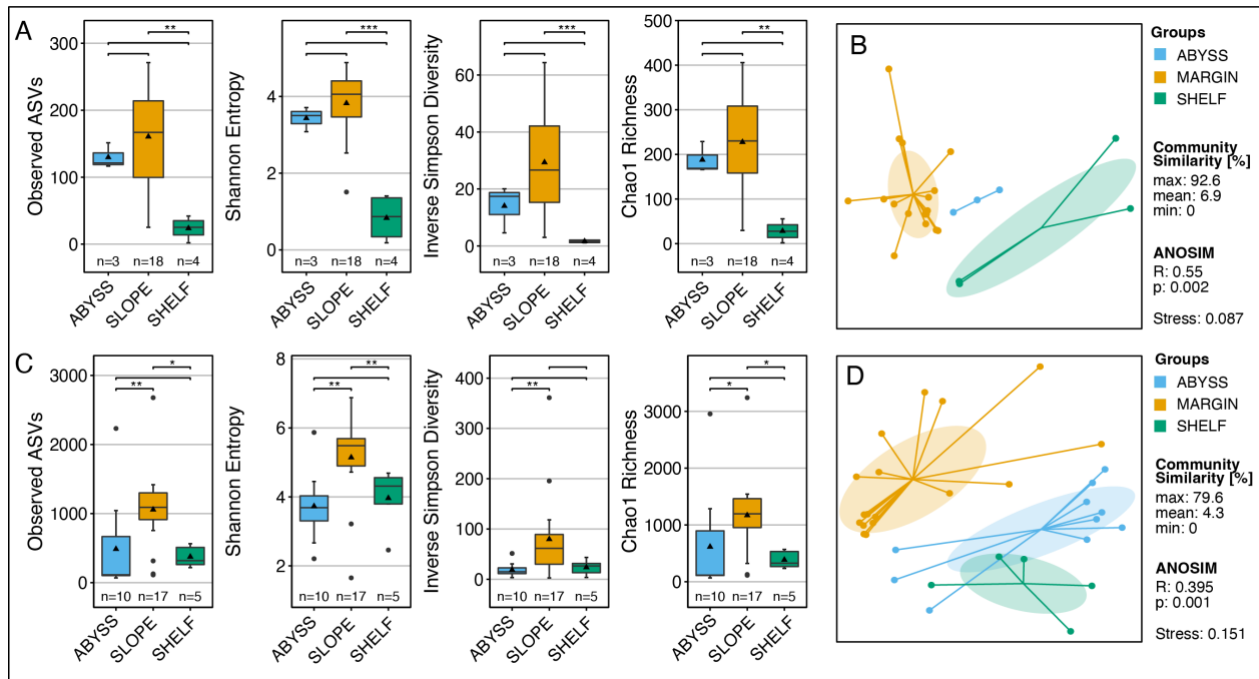

**Fig. S24: Microbial diversity in subsurface sediments from different depositional environments.** Archaeal (A, B) and bacterial (C, D) alpha diversity and beta diversity are significantly different between shelf and slope subsurface sediments. Significances were calculated with a Wilcoxon Rank sum test. Levels are: \*:  $p < 0.05$ , \*\*:  $p < 0.01$ , \*\*\*:  $p < 0.001$ . Note: The number of archaeal datasets for abyssal and shelf environments is low providing limited statistical support.

## Additional supplementary materials

- Dataset S1: Project IDs and Dataset Accession numbers
- Dataset S2: Sample IDs and contextual data
- Dataset S3: Diversity Indices of Archaea
- Dataset S4: Diversity Indices of Bacteria
- Dataset S5: List of phyloFlash NTUs and their taxonomy
- Dataset S6: List of rpS3 seqs and their taxonomy
- Dataset S7: Wilcoxon statistics of diversity index calculations
- Dataset S8: VisuaR community analysis log for archaea
- Dataset S9: VisuaR community analysis log for bacteria
- Dataset S10: Example DADA2 analysis script
- Dataset S11: Example VisuaR User Input script
- Dataset S12: Example VisuaR Analysis script
- Movie S1: 3D NMDS ordination of archaeal ASV grouped based on biomes and depths
- Movie S2: 3D NMDS ordination of bacterial ASV grouped based on biomes and depths

## REFERENCES AND NOTES

1. K. Takai, K. Nakamura, T. Toki, U. Tsunogai, M. Miyazaki, J. Miyazaki, H. Hirayama, S. Nakagawa, T. Nunoura, K. Horikoshi, Cell proliferation at 122°C and isotopically heavy CH<sub>4</sub> production by a hyperthermophilic methanogen under high-pressure cultivation. *Proc. Natl. Acad. Sci. U.S.A.* **105**, 10949–10954 (2008).
2. N. Merino, H. S. Aronson, D. P. Bojanova, J. Feyhl-Buska, M. L. Wong, S. Zhang, D. Giovannelli, Living at the extremes: Extremophiles and the limits of life in a planetary context. *Front. Microbiol.* **10**, 780 (2019).
3. V. P. Edgcomb, S. J. Molyneaux, S. Böer, C. O. Wirsén, M. Saito, M. S. Atkins, K. Lloyd, A. Teske, Survival and growth of two heterotrophic hydrothermal vent archaea, *Pyrococcus* strain GB-D and *Thermococcus fumicolans*, under low pH and high sulfide concentrations in combination with high temperature and pressure regimes. *Extremophiles*. **11**, 329–342 (2007).
4. N. Ando, B. Barquera, D. H. Bartlett, E. Boyd, A. A. Burnim, A. S. Byer, D. Colman, R. E. Gillilan, M. Gruebele, G. Makhataдзе, C. A. Royer, E. Shock, A. J. Wand, M. B. Watkins, The molecular basis for life in extreme environments. *Annu. Rev. Biophys.* **50**, 343–372 (2021).
5. Y. M. Bar-On, R. Phillips, R. Milo, The biomass distribution on Earth. *Proc. Natl. Acad. Sci. U.S.A.* **115**, 6506–6511 (2018).
6. A. Teske, K. B. Sørensen, Uncultured archaea in deep marine subsurface sediments: Have we caught them all? *ISME J.* **2**, 3–18 (2008).
7. C. Magnabosco, L.-H. Lin, H. Dong, M. Bomberg, W. Ghiorse, H. Stan-Lotter, K. Pedersen, T. L. Kieft, E. van Heerden, T. C. Onstott, The biomass and biodiversity of the continental subsurface. *Nat. Geosci.* **11**, 707–717 (2018).
8. J. S. Lipp, Y. Morono, F. Inagaki, K.-U. Hinrichs, Significant contribution of Archaea to extant biomass in marine subsurface sediments. *Nature* **454**, 991–994 (2008).
9. T. W. Federle, D. C. Dobbins, J. R. Thornton-Manning, D. D. Jones, Microbial biomass, activity,

and community structure in subsurface soils. *Groundwater* **24**, 365–374 (1986).

10. J. F. Biddle, J. B. Sylvan, W. J. Brazelton, B. J. Tully, K. J. Edwards, C. L. Moyer, J. F. Heidelberg, W. C. Nelson, Prospects for the study of evolution in the deep biosphere. *Front. Microbiol.* **2**, 285 (2012).
11. W. B. Whitman, D. C. Coleman, W. J. Wiebe, Prokaryotes: The unseen majority. *Proc. Natl. Acad. Sci. U.S.A.* **95**, 6578–6583 (1998).
12. R. C. Beaver, J. D. Neufeld, Microbial ecology of the deep terrestrial subsurface. *ISME J.* **18** wrae091 (2024).
13. E. O. Straume, C. Gaina, S. Medvedev, K. Hochmuth, K. Gohl, J. M. Whittaker, R. Abdul Fattah, J. C. Doornenbal, J. R. Hopper, GlobSed: Updated total sediment thickness in the world's oceans. *Geochem. Geophys. Geosyst.* **20**, 1756–1772 (2019).
14. J. F. Biddle, J. S. Lipp, M. A. Lever, K. G. Lloyd, K. B. Sørensen, R. Anderson, H. F. Fredricks, M. Elvert, T. J. Kelly, D. P. Schrag, M. L. Sogin, J. E. Brenchley, A. Teske, C. H. House, K.-U. Hinrichs, Heterotrophic Archaea dominate sedimentary subsurface ecosystems off Peru. *Proc. Natl. Acad. Sci. U.S.A.* **103**, 3846–3851 (2006).
15. S. Xie, J. S. Lipp, G. Wegener, T. G. Ferdelman, K.-U. Hinrichs, Turnover of microbial lipids in the deep biosphere and growth of benthic archaeal populations. *Proc. Natl. Acad. Sci. U.S.A.* **110**, 6010–6014 (2013).
16. K. G. Lloyd, M. K. May, R. T. Kevorkian, A. D. Steen, Meta-analysis of quantification methods shows that archaea and bacteria have similar abundances in the subseafloor. *Appl. Environ. Microbiol.* **79**, 7790–7799 (2013).
17. T. Hoshino, H. Doi, G. Uramoto, L. Wörmer, R. R. Adhikari, N. Xiao, Y. Morono, S. D'Hondt, K.-U. Hinrichs, F. Inagaki, Global diversity of microbial communities in marine sediment. *Proc. Natl. Acad. Sci. U.S.A.* **117**, 27587–27597 (2020).
18. J. Kallmeyer, R. Pockalny, R. R. Adhikari, D. C. Smith, S. D'Hondt, Global distribution of

- microbial abundance and biomass in subseafloor sediment. *Proc. Natl. Acad. Sci.* **109**, 16213–16216 (2012).
19. H.-C. Flemming, S. Wuertz, Bacteria and archaea on Earth and their abundance in biofilms. *Nat. Rev. Microbiol.* **17**, 247–260 (2019).
20. S. McMahon, J. Parnell, Weighing the deep continental biosphere. *FEMS Microbiol. Ecol.* **87**, 113–120 (2014).
21. R. J. Parkes, B. Cragg, E. Roussel, G. Webster, A. Weightman, H. Sass, A review of prokaryotic populations and processes in sub-seafloor sediments, including biosphere:Geosphere interactions. *Mar. Geol.* **352**, 409–425 (2014).
22. Y. Morono, M. Ito, T. Hoshino, T. Terada, T. Hori, M. Ikehara, S. D'Hondt, F. Inagaki, Aerobic microbial life persists in oxic marine sediment as old as 101.5 million years. *Nat. Commun.* **11**, 3626 (2020).
23. E. A. Walsh, J. B. Kirkpatrick, S. D. Rutherford, D. C. Smith, M. Sogin, S. D'Hondt, Bacterial diversity and community composition from seafloor to subseafloor. *ISME J.* **10**, 979–989 (2016).
24. P. Starnawski, T. Bataillon, T. J. G. Ettema, L. M. Jochum, L. Schreiber, X. Chen, M. A. Lever, M. F. Polz, B. B. Jørgensen, A. Schramm, K. U. Kjeldsen, Microbial community assembly and evolution in subseafloor sediment. *Proc. Natl. Acad. Sci. U.S.A.* **114**, 2940–2945 (2017).
25. J. B. Kirkpatrick, E. A. Walsh, S. D'Hondt, Microbial selection and survival in subseafloor sediment. *Front. Microbiol.* **10**, 956 (2019).
26. C. Petro, B. Zäncker, P. Starnawski, L. M. Jochum, T. G. Ferdelman, B. B. Jørgensen, H. Røy, K. U. Kjeldsen, A. Schramm, Marine deep biosphere microbial communities assemble in near-Surface sediments in Aarhus Bay. *Front. Microbiol.* **10**, 758 (2019).
27. V. Hubalek, X. Wu, A. Eiler, M. Buck, C. Heim, M. Dopson, S. Bertilsson, D. Ionescu, Connectivity to the surface determines diversity patterns in subsurface aquifers of the

Fennoscandian shield. *ISME J.* **10**, 2447–2458 (2016).

28. J. L. Meyer, U. Jaekel, B. J. Tully, B. T. Glazer, C. G. Wheat, H. Lin, C. Hsieh, J. P. Cowen, S. M. Hulme, P. R. Girguis, J. A. Huber, A distinct and active bacterial community in cold oxygenated fluids circulating beneath the western flank of the Mid-Atlantic ridge. *Sci. Rep.* **6**, 22541 (2016).
29. L. I. Putman, M. C. Sabuda, W. J. Brazelton, M. D. Kubo, T. M. Hoehler, T. M. McCollom, D. Cardace, M. O. Schrenk, Microbial communities in a serpentinizing aquifer are assembled through strong concurrent dispersal limitation and selection. *mSystems* **6**, e0030021 (2021).
30. Y. Zhang, A. E. Dekas, A. J. Hawkins, A. E. Parada, O. Gorbatenko, K. Li, R. N. Horne, *Water Resour. Res.*, **56**, e2019WR025916 (2020).
31. D. Scheidweiler, F. Miele, H. Peter, T. J. Battin, P. de Anna, Trait-specific dispersal of bacteria in heterogeneous porous environments: From pore to porous medium scale. *J. R. Soc. Interface* **17**, 20200046 (2020).
32. T. Hoshino, T. Toki, A. Ijiri, Y. Morono, H. Machiyama, J. Ashi, K. Okamura, F. Inagaki, *Atribacteria* from the subseafloor sedimentary biosphere disperse to the hydrosphere through submarine mud volcanoes. *Front. Microbiol.* **8**, 1135 (2017).
33. S. E. Ruff, J. Felden, H. R. Gruber-Vodicka, Y. Marcon, K. Knittel, A. Ramette, A. Boetius, In situ development of a methanotrophic microbiome in deep-sea sediments. *ISME J.* **13**, 197–213 (2019).
34. A. Chakraborty, S. E. Ruff, X. Dong, E. D. Ellefson, C. Li, J. M. Brooks, J. McBee, B. B. Bernard, C. R. J. Hubert, Hydrocarbon seepage in the deep seabed links subsurface and seafloor biospheres. *Proc. Natl. Acad. Sci. U.S.A.* **117**, 11029–11037 (2020).
35. D. A. Gittins, P.-A. Desiagne, N. Morrison, J. E. Rattray, S. Bhatnagar, A. Chakraborty, J. Zorz, C. Li, O. Horanszky, M. A. Cramm, F. Bisiach, R. Bennett, J. Webb, A. MacDonald, M. Fowler, D. C. Campbell, C. R. J. Hubert, Geological processes mediate a microbial dispersal loop in the deep biosphere. *Sci. Adv.* **8**, eabn3485 (2022).

36. A. D. Steen, R. T. Kevorkian, J. T. Bird, N. Dombrowski, B. J. Baker, S. M. Hagen, K. H. Mulligan, J. M. Schmidt, A. T. Webber, T. M. Royalty, M. J. Alperin, Kinetics and identities of extracellular peptidases in subsurface sediments of the white Oak River Estuary, North Carolina. *Appl. Environ. Microbiol.* **85**, e00102-19 (2019).
37. J. T. Bird, E. D. Tague, L. Zinke, J. M. Schmidt, A. D. Steen, B. Reese, I. P. G. Marshall, G. Webster, A. Weightman, H. F. Castro, S. R. Campagna, K. G. Lloyd, Uncultured microbial phyla suggest mechanisms for multi-thousand-year subsistence in Baltic sea sediments. *MBio* **10**, e02376-18 (2019).
38. W. D. Orsi, V. P. Edgcomb, G. D. Christman, J. F. Biddle, Gene expression in the deep biosphere. *Nature*. **499**, 205–208 (2013).
39. M. A. Lever, Acetogenesis in the energy-starved deep biosphere—A paradox? *Front. Microbiol.* **2**, 284 (2012).
40. Y. He, M. Li, V. Perumal, X. Feng, J. Fang, J. Xie, S. M. Sievert, F. Wang, Genomic and enzymatic evidence for acetogenesis among multiple lineages of the archaeal phylum Bathyarchaeota widespread in marine sediments. *Nat. Microbiol.* **1**, 16035 (2016).
41. C. J. Newberry, G. Webster, B. A. Cragg, R. J. Parkes, A. J. Weightman, J. C. Fry, Diversity of prokaryotes and methanogenesis in deep subsurface sediments from the Nankai Trough, Ocean Drilling Program Leg 190. *Environ. Microbiol.* **6**, 274–287 (2004).
42. L. Momper, C. P. Casar, M. R. Osburn, A metagenomic view of novel microbial and metabolic diversity found within the deep terrestrial biosphere at DeMMO: A microbial observatory in South Dakota , USA. *Environ. Microbiol.* **25**, 3719–3737 (2023).
43. S. E. Ruff, P. Humez, I. H. de Angelis, M. Diao, M. Nightingale, S. Cho, L. Connors, O. O. Kuloyo, A. Seltzer, S. Bowman, S. D. Wankel, C. N. McClain, B. Mayer, M. Strous, Hydrogen and dark oxygen drive microbial productivity in diverse groundwater ecosystems. *Nat. Commun.* **14**, 3194 (2023).
44. M. H. Møller, C. Glombitza, M. A. Lever, L. Deng, Y. Morono, F. Inagaki, M. Doll, C. Su, B.

- A. Lomstein, D:L-amino acid modeling reveals fast microbial turnover of days to months in the subsurface hydrothermal sediment of Guaymas Basin. *Front. Microbiol.* **9**, 967 (2018).
45. J. A. Bradley, J. P. Amend, D. E. LaRowe, Necromass as a Limited Source of Energy for Microorganisms in Marine Sediments. *J. Geophys. Res. Biogeosci.* **123**, 577–590 (2018).
46. S. Pérez Castro, M. A. Borton, K. Regan, I. Hrabe de Angelis, K. C. Wrighton, A. P. Teske, M. Strous, S. E. Ruff, Degradation of biological macromolecules supports uncultured microbial populations in Guaymas Basin hydrothermal sediments. *ISME J.* **15**, 3480–3497 (2021).
47. N. M. Chaudhari, W. A. Overholt, P. A. Figueroa-Gonzalez, M. Taubert, T. L. V. Bornemann, A. J. Probst, M. Hölzer, M. Marz, K. Küsel, The economical lifestyle of CPR bacteria in groundwater allows little preference for environmental drivers. *Environ. Microbiome* **16**, 24 (2021).
48. K. Schwank, T. L. V. Bornemann, N. Dombrowski, A. Spang, J. F. Banfield, A. J. Probst, An archaeal symbiont-host association from the deep terrestrial subsurface. *ISME J.* **13**, 2135–2139 (2019).
49. M. O. Schrenk, W. J. Brazelton, S. Q. Lang, Serpentinization, Carbon, and Deep Life. *Rev. Mineral. Geochemistry.* **75**, 575–606 (2013).
50. J. F. Sauvage, A. Flinders, A. J. Spivack, R. Pockalny, A. G. Dunlea, C. H. Anderson, D. C. Smith, R. W. Murray, S. D'Hondt, The contribution of water radiolysis to marine sedimentary life. *Nat. Commun.* **12**, 1297 (2021).
51. L.-H. Lin, J. Hall, J. Lippmann-Pipke, J. A. Ward, B. Sherwood Lollar, M. DeFlaun, R. Rothmel, D. Moser, T. M. Gihring, B. Mislouack, T. C. Onstott, Radiolytic H<sub>2</sub> in continental crust: Nuclear power for deep subsurface microbial communities. *Geochem. Geophys. Geosyst.* **6**, Q07003 (2005).
52. J. T. Lennon, S. E. Jones, Microbial seed banks: The ecological and evolutionary implications of dormancy. *Nat. Rev. Microbiol.* **9**, 119–130 (2011).

53. A. Schippers, L. N. Neretin, J. Kallmeyer, T. G. Ferdelman, B. A. Cragg, R. John Parkes, B. B. Jørgensen, Prokaryotic cells of the deep sub-seafloor biosphere identified as living bacteria. *Nature* **433**, 861–864 (2005).
54. Y. Morono, T. Terada, M. Nishizawa, M. Ito, F. Hillion, N. Takahata, Y. Sano, F. Inagaki, Carbon and nitrogen assimilation in deep subseafloor microbial cells. *Proc. Natl. Acad. Sci. U.S.A.* **108**, 18295–18300 (2011).
55. B. B. Jørgensen, Deep subseafloor microbial cells on physiological standby. *Proc. Natl. Acad. Sci. U.S.A.* **108**, 18193–18194 (2011).
56. E. Trembath-Reichert, Y. Morono, A. Ijiri, T. Hoshino, K. S. Dawson, F. Inagaki, V. J. Orphan, Methyl-compound use and slow growth characterize microbial life in 2-km-deep subseafloor coal and shale beds. *Proc. Natl. Acad. Sci. U.S.A.* **114**, E9206–E9215 (2017).
57. P. B. Price, T. Sowers, Temperature dependence of metabolic rates for microbial growth, maintenance, and survival. *Proc. Natl. Acad. Sci. U.S.A.* **101**, 4631–4636 (2004).
58. S. Braun, Y. Morono, S. Littmann, M. Kuypers, H. Aslan, M. Dong, B. B. Jørgensen, B. A. Lomstein, Size and carbon content of sub-seafloor microbial cells at landsort deep, Baltic Sea. *Front. Microbiol.* **7**, 1375 (2016).
59. A. Soares, A. Edwards, D. An, A. Bagnoud, J. Bradley, E. Barnhart, M. Bomberg, K. Budwill, S. M. Caffrey, M. Fields, J. Gralnick, V. Kadnikov, L. Momper, M. Osburn, A. Mu, J. W. Moreau, D. Moser, L. Purkamo, S. M. Rassner, C. S. Sheik, B. Sherwood Lollar, B. M. Toner, G. Voordouw, K. Wouters, A. C. Mitchell, A global perspective on bacterial diversity in the terrestrial deep subsurface. *Microbiology* **169**, 001172 (2023).
60. Y. Wang, H.-F. Sheng, Y. He, J.-Y. Wu, Y.-X. Jiang, N. F.-Y. Tam, H.-W. Zhou, Comparison of the levels of bacterial diversity in freshwater, Intertidal wetland, and marine sediments by using millions of illumina tags. *Appl. Environ. Microbiol.* **78**, 8264–8271 (2012).
61. E. R. Handler, S. D. J. Andersen, R. Gradinger, M. McGovern, A. Vader, A. E. Poste, Seasonality in land-ocean connectivity and local processes control sediment bacterial community

structure and function in a High Arctic tidal flat. *FEMS Microbiol. Ecol.* **100**, fiad162 (2024).

62. H. S. Tee, D. Waite, G. Lear, K. M. Handley, Microbial river-to-sea continuum: gradients in benthic and planktonic diversity, osmoregulation and nutrient cycling. *Microbiome* **9**, 190 (2021).
63. T. Fenchel, M. Whitfield, P. Meadows, J. Huisman, Microbial ecology on land and sea [and discussion]. *Philos. Trans. Biol. Sci.* **343**, 51–56 (1994).
64. N. Lang-Yona, J. M. Flores, R. Haviv, A. Alberti, J. Poulain, C. Belser, M. Trainic, D. Gat, H. Ruscheweyh, P. Wincker, S. Sunagawa, Y. Rudich, I. Koren, A. Vardi, Terrestrial and marine influence on atmospheric bacterial diversity over the north Atlantic and Pacific Oceans. *Commun. Earth Environ.* **3**, 121 (2022).
65. C. A. Lozupone, R. Knight, Global patterns in bacterial diversity. *Proc. Natl. Acad. Sci. U.S.A.* **104**, 11436–11440 (2007).
66. K. T. Jurdzinski, M. Mehrshad, L. F. Delgado, Z. Deng, S. Bertilsson, A. F. Andersson, Large-scale phylogenomics of aquatic bacteria reveal molecular mechanisms for adaptation to salinity. *Sci. Adv.* **9**, eadg2059 (2023).
67. L. R. Thompson, J. G. Sanders, D. McDonald, A. Amir, J. Ladau, K. J. Locey, R. J. Prill, A. Tripathi, S. M. Gibbons, G. Ackermann, J. A. Navas-Molina, S. Janssen, E. Kopylova, Y. Vázquez-Baeza, A. González, J. T. Morton, S. Mirarab, Z. Zech Xu, L. Jiang, M. F. Haroon, J. Kanbar, Q. Zhu, S. Jin Song, T. Kosciulek, N. A. Bokulich, J. Lefler, C. J. Brislawn, G. Humphrey, S. M. Owens, J. Hampton-Marcell, D. Berg-Lyons, V. McKenzie, N. Fierer, J. A. Fuhrman, A. Clauset, R. L. Stevens, A. Shade, K. S. Pollard, K. D. Goodwin, J. K. Jansson, J. A. Gilbert, R. Knight, Earth Microbiome Project Consortium, A communal catalogue reveals Earth’s multiscale microbial diversity. *Nature* **551**, 457–463 (2017).
68. T. M. Voser, M. D. Campbell, A. R. Carroll, How different are marine microbial natural products compared to their terrestrial counterparts? *Nat. Prod. Rep.* **39**, 7–19 (2022).
69. S. Sunagawa, L. P. Coelho, S. Chaffron, J. R. Kultima, K. Labadie, G. Salazar, B. Djahanschiri,

G. Zeller, D. R. Mende, A. Alberti, F. M. Cornejo-Castillo, P. I. Costea, C. Cruaud, F. D'Ovidio, S. Engelen, I. Ferrera, J. M. Gasol, L. Guidi, F. Hildebrand, F. Kokoszka, C. Lepoivre, G. Lima-Mendez, J. Poulain, B. T. Poulos, M. Royo-Llonch, H. Sarmento, S. Vieira-Silva, C. Dimier, M. Picheral, S. Searson, S. Kandels-Lewis, C. Bowler, C. de Vargas, G. Gorsky, N. Grimsley, P. Hingamp, D. Iudicone, O. Jaillon, F. Not, H. Ogata, S. Pesant, S. Speich, L. Stemann, M. B. Sullivan, J. Weissenbach, P. Wincker, E. Karsenti, J. Raes, S. G. Acinas, P. Bork, E. Boss, C. Bowler, M. Follows, L. Karp-Boss, U. Krzic, E. G. Reynaud, C. Sardet, M. Sieracki, D. Velayoudon, Structure and function of the global ocean microbiome. *Science* **348**, 1261359 (2015).

70. M. Mestre, C. Ruiz-González, R. Logares, C. M. Duarte, J. M. Gasol, M. M. Sala, Sinking particles promote vertical connectivity in the ocean microbiome. *Proc. Natl. Acad. Sci. U.S.A.* **115**, E6799–E6807 (2018).
71. S. G. Acinas, P. Sánchez, G. Salazar, F. M. Cornejo-Castillo, M. Sebastián, R. Logares, M. Royo-Llonch, L. Paoli, S. Sunagawa, P. Hingamp, H. Ogata, G. Lima-Mendez, S. Roux, J. M. González, J. M. Arrieta, I. S. Alam, A. Kamau, C. Bowler, J. Raes, S. Pesant, P. Bork, S. Agustí, T. Gojabori, D. Vaqué, M. B. Sullivan, C. Pedrós-Alió, R. Massana, C. M. Duarte, J. M. Gasol, Deep ocean metagenomes provide insight into the metabolic architecture of bathypelagic microbial communities. *Commun. Biol.* **4**, 604 (2021).
72. M. Delgado-Baquerizo, A. M. Oliverio, T. E. Brewer, A. Benavent-González, D. J. Eldridge, R. D. Bardgett, F. T. Maestre, B. K. Singh, N. Fierer, A global atlas of the dominant bacteria found in soil. *Science* **359**, 320–325 (2018).
73. E. B. Graham, A. P. Camargo, R. Wu, R. Y. Neches, M. Nolan, D. Paez-Espino, N. C. Kyrpides, J. K. Jansson, J. E. McDermott, K. S. Hofmockel, Soil Virosphere Consortium, A global atlas of soil viruses reveals unexplored biodiversity and potential biogeochemical impacts. *Nat. Microbiol.* 1873–1883 (2024).
74. S. Nayfach, S. Roux, R. Seshadri, D. Udway, N. Varghese, F. Schulz, D. Wu, D. Paez-Espino, I. Chen, M. Huntemann, K. Palaniappan, J. Ladau, S. Mukherjee, T. B. K. Reddy, T. Nielsen, E. Kirton, J. P. Faria, J. N. Edirisinghe, C. S. Henry, S. P. Jungbluth, D. Chivian, P. Dehal, E. M.

- Wood-Charlson, A. P. Arkin, S. G. Tringe, A. Visel, IMG/M Data Consortium, T. Woyke, N. J. Mouncey, N. N. Ivanova, N. C. Kyrpides, E. A. Elie-Fadrosh, A genomic catalog of Earth's microbiomes. *Nat. Biotechnol.* **39**, 499–509 (2021).
75. J. P. Shaffer, L.-F. Nothias, L. R. Thompson, J. G. Sanders, R. A. Salido, S. P. Couvillion, A. D. Brejnrod, F. Lejzerowicz, N. Haiminen, S. Huang, H. L. Lutz, Q. Zhu, C. Martino, J. T. Morton, S. Karthikeyan, M. Nothias-Espósito, K. Dührkop, S. Böcker, H. W. Kim, A. A. Aksenov, W. Bittremieux, J. J. Minich, C. Marotz, M. M. Bryant, K. Sanders, T. Schwartz, G. Humphrey, Y. Vásquez-Baeza, A. Tripathi, L. Parida, A. P. Carrieri, K. L. Beck, P. Das, A. González, D. McDonald, J. Ladau, S. M. Karst, M. Albertsen, G. Ackermann, J. DeReus, T. Thomas, D. Petras, A. Shade, J. Stegen, S. J. Song, T. O. Metz, A. D. Swafford, P. C. Dorrestein, J. K. Jansson, J. A. Gilbert, R. Knight, the Earth Microbiome Project 500 (EMP500) Consortium, Standardized multi-omics of Earth's microbiomes reveals microbial and metabolite diversity. *Nat. Microbiol.* **7**, 2128–2150 (2022).
76. A. Vion, L. Menot, Continental margins between 140m and 3500m depth (IFREMER - COMARGE, 2009) (2009); [www.marineregions.org/maps.php?album=3264&pic=64937](http://www.marineregions.org/maps.php?album=3264&pic=64937)).
77. D. E. LaRowe, S. Arndt, J. A. Bradley, E. Burwicz, A. W. Dale, J. P. Amend, Organic carbon and microbial activity in marine sediments on a global scale throughout the Quaternary. *Geochim. Cosmochim. Acta* **286**, 227–247 (2020).
78. J. A. Bradley, S. Arndt, J. P. Amend, E. Burwicz, A. W. Dale, M. Egger, D. E. LaRowe, Widespread energy limitation to life in global subseafloor sediments. *Sci. Adv.* **6**, eaba0697 (2020).
79. S. J. Salter, M. J. Cox, E. M. Turek, S. T. Calus, W. O. Cookson, M. F. Moffatt, P. Turner, J. Parkhill, N. J. Loman, A. W. Walker, Reagent and laboratory contamination can critically impact sequence-based microbiome analyses. *BMC Biol.* **12**, 87 (2014).
80. C. S. Sheik, B. K. Reese, K. I. Twing, J. B. Sylvan, S. L. Grim, M. O. Schrenk, M. L. Sogin, F. S. Colwell, Identification and removal of contaminant sequences from ribosomal gene databases: Lessons from the census of deep life. *Front. Microbiol.* **9**, 840 (2018).

81. K. Kennedy, M. W. Hall, M. D. J. Lynch, G. Moreno-Hagelsieb, J. D. Neufeld, Evaluating bias of Illumina-based bacterial 16S rRNA gene profiles. *Appl. Environ. Microbiol.* **80**, 5717–5722 (2014).
82. M. Schirmer, U. Z. Ijaz, R. D’Amore, N. Hall, W. T. Sloan, C. Quince, Insight into biases and sequencing errors for amplicon sequencing with the Illumina MiSeq platform. *Nucleic Acids Res.* **43**, e37 (2015).
83. K. Piwosz, T. Shabarova, J. Pernthaler, T. Posch, K. Šimek, P. Porcal, M. M. Salcher, Bacterial and eukaryotic small-subunit amplicon data do not provide a quantitative picture of microbial communities, but they are reliable in the context of ecological interpretations. *mSphere* **5**, e00052-20 (2020).
84. R. E. Anderson, E. D. Graham, J. A. Huber, B. J. Tully, Microbial populations are shaped by dispersal and recombination in a low biomass subseafloor habitat. *MBio* e0035422 (2022).
85. J. E. Hinkle, J. P. Chanton, M. A. Moynihan, S. E. Ruff, A. Teske, Complex bacterial diversity of Guaymas Basin hydrothermal sediments revealed by synthetic long-read sequencing (LoopSeq). bioRxiv 589229 [Preprint] (2024). <https://doi:10.1101/2024.04.12.589229>.
86. H. Mallick, A. Rahnavard, L. J. McIver, S. Ma, Y. Zhang, L. H. Nguyen, T. L. Tickle, G. Weingart, B. Ren, E. H. Schwager, S. Chatterjee, K. N. Thompson, J. E. Wilkinson, A. Subramanian, Y. Lu, L. Waldron, J. N. Paulson, E. A. Franzosa, H. C. Bravo, C. Huttenhower, Multivariable association discovery in population-scale meta-omics studies. *PLOS Comput. Biol.* **17**, e1009442 (2021).
87. G. A. Coleman, A. A. Davín, T. A. Mahendrarajah, L. L. Szánthó, A. Spang, P. Hugenholtz, G. J. Szöllősi, T. A. Williams, A rooted phylogeny resolves early bacterial evolution. *Science* **372**, eabe0511 (2021).
88. J. T. Staley, A. Konopka, Measurement of in situ activities of nonphotosynthetic microorganisms in aquatic and terrestrial habitats. *Annu. Rev. Microbiol.* **39**, 321–346 (1985).
89. M. L. Sogin, H. G. Morrison, J. A. Huber, D. M. Welch, S. M. Huse, P. R. Neal, J. M. Arrieta,

- G. J. Herndl, Microbial diversity in the deep sea and the underexplored “rare biosphere”. *Proc. Natl. Acad. Sci. U.S.A.* **103**, 12115–12120 (2006).
90. K. G. Lloyd, A. D. Steen, J. Ladau, J. Yin, L. Crosby, Phylogenetically novel uncultured microbial cells dominate earth microbiomes. *mSystems* **3**, e00055-18 (2018).
91. A. Vuillemin, S. D. Wankel, Ö. K. Coskun, T. Magritsch, S. Vargas, E. R. Estes, A. J. Spivack, D. C. Smith, R. Pockalny, R. W. Murray, S. D’Hondt, W. D. Orsi, Archaea dominate oxic subseafloor communities over multimillion-year time scales. *Sci. Adv.* **5**, eaaw4108 (2019).
92. A. J. Probst, B. Ladd, J. K. Jarett, D. E. Geller-McGrath, C. M. K. Sieber, J. B. Emerson, K. Anantharaman, B. C. Thomas, R. R. Malmstrom, M. Stieglmeier, A. Klingl, T. Woyke, M. C. Ryan, J. F. Banfield, Differential depth distribution of microbial function and putative symbionts through sediment-hosted aquifers in the deep terrestrial subsurface. *Nat. Microbiol.* **3**, 328–336 (2018).
93. C. He, R. Keren, M. L. Whittaker, I. F. Farag, J. A. Doudna, J. H. D. Cate, J. F. Banfield, Genome-resolved metagenomics reveals site-specific diversity of episymbiotic CPR bacteria and DPANN archaea in groundwater ecosystems. *Nat. Microbiol.* **6**, 354–365 (2021).
94. D. Chivian, E. L. Brodie, E. J. Alm, D. E. Culley, P. S. Dehal, T. Z. DeSantis, T. M. Gihring, A. Lapidus, L.-H. Lin, S. R. Lowry, D. P. Moser, P. M. Richardson, G. Southam, G. Wanger, L. M. Pratt, G. L. Andersen, T. C. Hazen, F. J. Brockman, A. P. Arkin, T. C. Onstott, Environmental genomics reveals a single-species Ecosystem deep within earth. *Science*. **322**, 275–278 (2008).
95. J. M. Labonté, E. K. Field, M. Lau, D. Chivian, E. Van Heerden, K. E. Wommack, T. L. Kieft, T. C. Onstott, R. Stepanauskas, Single cell genomics indicates horizontal gene transfer and viral infections in a deep subsurface Firmicutes population. *Front. Microbiol.* **6**, 349 (2015).
96. O. V. Karnachuk, Y. A. Frank, A. P. Lukina, V. V. Kadnikov, A. V. Beletsky, A. V. Mardanov, N. V. Ravin, Domestication of previously uncultivated *Candidatus Desulforudis audaxviator* from a deep aquifer in Siberia sheds light on its physiology and evolution. *ISME J.* **13**, 1947–1959 (2019).

97. O. V. Karnachuk, A. P. Lukina, V. V. Kadnikov, V. A. Sherbakova, A. V. Beletsky, A. V. Mardanov, N. V. Ravin, Targeted isolation based on metagenome-assembled genomes reveals a phylogenetically distinct group of thermophilic spirochetes from deep biosphere. *Environ. Microbiol.* **23**, 3585–3598 (2021).
98. S. A. Carr, B. N. Orcutt, K. W. Mandernack, J. R. Spear, Abundant Atribacteria in deep marine sediment from the Adélie Basin, Antarctica. *Front. Microbiol.* **6**, 872 (2015).
99. Y. M. Lee, K. Hwang, J. Il Lee, M. Kim, C. Y. Hwang, H.-J. Noh, H. Choi, H. K. Lee, J. Chun, S. G. Hong, S. C. Shin, Genomic insight into the predominance of candidate phylum Atribacteria JS1 lineage in marine sediments. *Front. Microbiol.* **9**, 2909 (2018).
100. A. Vuillemin, D. Ariztegui, F. Horn, J. Kallmeyer, W. D. Orsi, PASADO Science Team, Microbial community composition along a 50 000-year lacustrine sediment sequence. *FEMS Microbiol. Ecol.* **94**, fiy029 (2018).
101. A. Vuillemin, S. Vargas, Ö. K. Coskun, R. Pockalny, R. W. Murray, D. C. Smith, S. D'hondt, W. D. Orsi, Atribacteria reproducing over millions of years in the atlantic abyssal subseafloor. *MBio* **11**, e01937-20 (2020).
102. T. Katayama, M. K. Nobu, H. Kusada, X. Meng, N. Hosogi, K. Uematsu, H. Yoshioka, Y. Kamagata, H. Tamaki, Isolation of a member of the candidate phylum 'Atribacteria' reveals a unique cell membrane structure. *Nat. Commun.* **11**, 6381 (2020).
103. R. Z. Moger-Reischer, J. I. Glass, K. S. Wise, L. Sun, D. M. C. Bittencourt, B. K. Lehmkuhl, D. R. Schoolmaster, M. Lynch, J. T. Lennon, Evolution of a minimal cell. *Nature*. **620**, 122–127 (2023).
104. J. B. Glass, P. Ranjan, C. B. Kretz, B. L. Nunn, A. M. Johnson, M. Xu, J. McManus, F. J. Stewart, Microbial metabolism and adaptations in Atribacteria -dominated methane hydrate sediments. *Environ. Microbiol.* **23**, 4646–4660 (2021).
105. K. Kubo, K. G. Lloyd, J. F Biddle, R. Amann, A. Teske, K. Knittel, Archaea of the Miscellaneous Crenarchaeotal Group are abundant, diverse and widespread in marine sediments.

*ISME J.* **6**, 1949–1965 (2012).

106. J. F. Biddle, S. Fitz-Gibbon, S. C. Schuster, J. E. Brenchley, C. H. House, Metagenomic signatures of the Peru Margin subseafloor biosphere show a genetically distinct environment. *Proc. Natl. Acad. Sci. U.S.A.* **105**, 10583–10588 (2008).
107. A. Dutta, S. Dutta Gupta, A. Gupta, J. Sarkar, S. Roy, A. Mukherjee, P. Sar, Exploration of deep terrestrial subsurface microbiome in late Cretaceous Deccan traps and underlying Archean basement, India. *Sci. Rep.* **8**, 17459 (2018).
108. L. Purkamo, R. Kietäväinen, M. Nuppenen-Puputti, M. Bomberg, C. Cousins, Ultradeep microbial communities at 4.4 km within crystalline bedrock: Implications for habitability in a planetary context. *Life*. **10**, 2 (2020).
109. C. Rinke, P. Schwientek, A. Sczyrba, N. N. Ivanova, I. J. Anderson, J.-F. Cheng, A. E. Darling, S. Malfatti, B. K. Swan, E. A. Gies, J. A. Dodsworth, B. P. Hedlund, G. Tsiamis, S. M. Sievert, W.-T. Liu, J. A. Eisen, S. J. Hallam, N. C. Kyrpides, R. Stepanauskas, E. M. Rubin, P. Hugenholtz, T. Woyke, Insights into the phylogeny and coding potential of microbial dark matter. *Nature* **499**, 431–437 (2013).
110. P. Yarza, P. Yilmaz, E. Pruesse, F. O. Glöckner, W. Ludwig, K.-H. Schleifer, W. B. Whitman, J. Euzéby, R. Amann, R. Rosselló-Móra, Uniting the classification of cultured and uncultured bacteria and archaea using 16S rRNA gene sequences. *Nat. Rev. Microbiol.* **12**, 635–645 (2014).
111. B. J. Baker, K. E. Appler, X. Gong, New microbial biodiversity in marine sediments. *Ann. Rev. Mar. Sci.* **13**, 161–175 (2021).
112. B. J. Tully, C. G. Wheat, B. T. Glazer, J. A. Huber, A dynamic microbial community with high functional redundancy inhabits the cold, oxic subseafloor aquifer. *ISME J.* **12**, 1–16 (2018).
113. K. J. Edwards, C. G. Wheat, J. B. Sylvan, Under the sea: Microbial life in volcanic oceanic crust. *Nat. Rev. Microbiol.* **9**, 703–712 (2011).
114. S. E. Ruff, in *Marine Hydrocarbon Seeps - Microbiology and Biogeochemistry of a Global*

*Marine Habitat*, A. P. Teske, V. Carvalho, Eds. (Springer, 2020), pp. 1–19;  
[http://link.springer.com/10.1007/978-3-030-34827-4\\_1](http://link.springer.com/10.1007/978-3-030-34827-4_1)).

115. M. Crespo-Medina, M. W. Bowles, V. A. Samarkin, K. S. Hunter, S. B. Joye, Microbial diversity and activity in seafloor brine lake sediments (Alaminos Canyon block 601, Gulf of Mexico). *Geobiology* **14**, 483–498 (2016).
116. N. Le Bris, M. Yücel, A. Das, S. M. Sievert, P. LokaBharathi, P. R. Girguis, Hydrothermal energy transfer and organic carbon production at the deep seafloor. *Front. Mar. Sci.* **5**, 531 (2019).
117. P. J. Mouser, M. Borton, T. H. Darrah, A. Hartsock, K. C. Wrighton, Hydraulic fracturing offers view of microbial life in the deep terrestrial subsurface. *FEMS Microbiol. Ecol.* **92**, fiw166 (2016).
118. O. Plümper, H. E. King, T. Geisler, Y. Liu, S. Pabst, I. P. Savov, D. Rost, T. Zack, Subduction zone forearc serpentinites as incubators for deep microbial life. *Proc. Natl. Acad. Sci. U.S.A.* **114**, 4324–4329 (2017).
119. W. J. Brazelton, B. Nelson, M. O. Schrenk, Metagenomic evidence for H<sub>2</sub> oxidation and H<sub>2</sub> production by serpentinite-hosted subsurface microbial communities. *Front. Microbiol.* **2**, 268 (2012).
120. S. Motamedi, B. N. Orcutt, G. L. Früh-Green, K. I. Twing, H. L. Pendleton, W. J. Brazelton, Microbial residents of the Atlantis Massif's shallow serpentinite subsurface. *Appl. Environ. Microbiol.* **86**, e00356-20 (2020).
121. J. L. Macalady, E. H. Lyon, B. Koffman, L. K. Albertson, K. Meyer, S. Galdenzi, S. Mariani, Dominant microbial populations in limestone-corroding stream biofilms, Frasassi cave system, Italy. *Appl. Environ. Microbiol.* **72**, 5596–5609 (2006).
122. F. Inagaki, K. U. Hinrichs, Y. Kubo, M. W. Bowles, V. B. Heuer, W. L. Hong, T. Hoshino, A. Ijiri, H. Imachi, M. Ito, M. Kaneko, M. A. Lever, Y. S. Lin, B. A. Methé, S. Morita, Y. Morono, W. Tanikawa, M. Bihan, S. A. Bowden, M. Elvert, C. Glombitza, D. Gross, G. J. Harrington, T.

Hori, K. Li, D. Limmer, C. H. Liu, M. Murayama, N. Ohkouchi, S. Ono, Y. S. Park, S. C. Phillips, X. Prieto-Mollar, M. Purkey, N. Riedinger, Y. Sanada, J. Sauvage, G. Snyder, R. Susilawati, Y. Takano, E. Tasumi, T. Terada, H. Tomaru, E. Trembath-Reichert, D. T. Wang, Y. Yamada, Exploring deep microbial life in coal-bearing sediment down to ~2.5 km below the ocean floor. *Science*. **349**, 420–424 (2015).

123. M. C. Y. Lau, T. L. Kieft, O. Kuloyo, B. Linage-Alvarez, E. van Heerden, M. R. Lindsay, C. Magnabosco, W. Wang, J. B. Wiggins, L. Guo, D. H. Perlman, S. Kyin, H. H. Shwe, R. L. Harris, Y. Oh, M. J. Yi, R. Purtschert, G. F. Slater, S. Ono, S. Wei, L. Li, B. Sherwood Lollar, T. C. Onstott, An oligotrophic deep-subsurface community dependent on syntrophy is dominated by sulfur-driven autotrophic denitrifiers. *Proc. Natl. Acad. Sci. U.S.A.* **113**, E7927–E7936 (2016).

124. L.-H. Lin, G. F. Slater, B. Sherwood Lollar, G. Lacrampe-Couloume, T. C. Onstott, The yield and isotopic composition of radiolytic H<sub>2</sub>, a potential energy source for the deep subsurface biosphere. *Geochim. Cosmochim. Acta* **69**, 893–903 (2005).

125. K. Pedersen, Exploration of deep intraterrestrial microbial life: Current perspectives. *FEMS Microbiol. Lett.* **185**, 9–16 (2000).

126. F. S. Colwell, R. P. Smith, in *Geophysical Monograph Series* (Wiley, 2004), vol. 144, pp. 355–367; <https://agupubs.onlinelibrary.wiley.com/doi/10.1029/144GM22>.

127. V. Rebata-Landa, J. C. Santamarina, Mechanical limits to microbial activity in deep sediments. *Geochem. Geophys. Geosyst.* **7**, Q11006 (2006).

128. S. D'Hondt, F. Inagaki, C. A. Zarikian, L. J. Abrams, N. Dubois, T. Engelhardt, H. Evans, T. Ferdelman, B. Gribsholt, R. N. Harris, B. W. Hoppie, J.-H. Hyun, J. Kallmeyer, J. Kim, J. E. Lynch, C. C. McKinley, S. Mitsunobu, Y. Morono, R. W. Murray, R. Pockalny, J. Sauvage, T. Shimono, F. Shiraishi, D. C. Smith, C. E. Smith-Duque, A. J. Spivack, B. O. Steinsbu, Y. Suzuki, M. Szpak, L. Toffin, G. Uramoto, Y. T. Yamaguchi, G. Zhang, X.-H. Zhang, W. Ziebis, Presence of oxygen and aerobic communities from sea floor to basement in deep-sea sediments. *Nat. Geosci.* **8**, 299–304 (2015).

129. S. E. Ruff, L. Schwab, E. Vidal, J. Hemingway, B. Kraft, R. Murali, Widespread occurrence of dissolved oxygen anomalies, aerobic microbes, and oxygen-producing metabolic pathways in apparently anoxic environments. *FEMS Microbiol. Ecol.*, **100**, fiae132 (2024).
130. S. L. Brantley, M. B. Goldhaber, K. V. Ragnarsdottir, Crossing disciplines and scales to understand the critical zone. *Elements* **3**, 307–314 (2007).
131. K. Küsel, K. U. Totsche, S. E. Trumbore, R. Lehmann, C. Steinhäuser, M. Herrmann, How deep can surface signals be traced in the critical zone? Merging biodiversity with biogeochemistry research in a central German Muschelkalk landscape. *Front. Earth Sci.* **4**, 32 (2016).
132. J. H. Steele, K. H. Brink, B. E. Scott, Comparison of marine and terrestrial ecosystems: Suggestions of an evolutionary perspective influenced by environmental variation. *ICES J. Mar. Sci.* **76**, 50–59 (2019).
133. M. H. Carr, J. E. Neigel, J. A. Estes, S. Andelman, R. R. Warner, J. L. Largier, Comparing marine and terrestrial ecosystems: Implications for the design of coastal marine reserves. *Ecol. Appl.* **13**, 90–107 (2003).
134. Y. Zhang, R. N. Horne, A. J. Hawkins, J. C. Primo, O. Gorbatenko, A. E. Dekas, Geological activity shapes the microbiome in deep-subsurface aquifers by advection. *Proc. Natl. Acad. Sci. U.S.A.* **119** e2113985119 (2022).
135. T. L. V. Bornemann, P. S. Adam, V. Turzynski, U. Schreiber, P. A. Figueroa-Gonzalez, J. Rahlff, D. Köster, T. C. Schmidt, R. Schunk, B. Krauthausen, A. J. Probst, Genetic diversity in terrestrial subsurface ecosystems impacted by geological degassing. *Nat. Commun.* **13**, 284 (2022).
136. T. Gleeson, N. Moosdorf, J. Hartmann, L. P. H. van Beek, A glimpse beneath earth's surface: GLobal HYdrogeology MaPS (GLHYMPS) of permeability and porosity. *Geophys. Res. Lett.* **41**, 3891–3898 (2014).
137. K. J. Edwards, A. T. Fisher, C. G. Wheat, The deep subsurface biosphere in igneous ocean

crust: Frontier habitats for microbiological exploration. *Front. Microbiol.* **3**, 8 (2012).

138. M. O. Schrenk, J. A. Huber, K. J. Edwards, Microbial provinces in the subseafloor. *Ann. Rev. Mar. Sci.* **2**, 279–304 (2010).
139. A. Longhurst, S. Sathyendranath, T. Platt, C. Caverhill, An estimate of global primary production in the ocean from satellite radiometer data. *J. Plankton Res.* **17**, 1245–1271 (1995).
140. G. Galla, N. Praeg, T. Rzehak, E. Sprecher, F. Colla, J. Seeber, P. Illmer, H. C. Hauffe, Comparison of DNA extraction methods on different sample matrices within the same terrestrial ecosystem. *Sci. Rep.* **14**, 8715 (2024).
141. M. C. Nelson, H. G. Morrison, J. Benjamino, S. L. Grim, J. Graf, Analysis, optimization and verification of illumina-generated 16S rRNA gene amplicon surveys. *PLOS ONE* **9**, e94249 (2014).
142. B. D. Topçuoğlu, L. C. Stewart, H. G. Morrison, D. A. Butterfield, J. A. Huber, J. F. Holden, Hydrogen limitation and syntrophic growth among natural assemblages of thermophilic methanogens at deep-sea hydrothermal vents. *Front. Microbiol.* **7**, 1240 (2016).
143. B. J. Callahan, P. J. McMurdie, M. J. Rosen, A. W. Han, A. J. A. Johnson, S. P. Holmes, DADA2: High-resolution sample inference from Illumina amplicon data. *Nat. Methods.* **13**, 581–583 (2016).
144. C. Quast, E. Pruesse, P. Yilmaz, J. Gerken, T. Schweer, P. Yarza, J. Peplies, F. O. Glöckner, The SILVA ribosomal RNA gene database project: Improved data processing and web-based tools. *Nucleic Acids Res.* **41**, D590–D596 (2013).
145. J. R. Bray, J. T. Curtis, An ordination of the upland forest communities of Southern Wisconsin. *Ecol. Monogr.* **27**, 325–349 (1957).
146. J. B. Kruskal, Nonmetric multidimensional scaling: A numerical method. *Psychometrika* **29**, 115–129 (1964).

147. J. Oksanen, F. G. Blanchet, R. Kindt, P. Legendre, P. R. Minchin, R. B. O'Hara, G. L. Simpson, P. Solymos, M. H. H. Stevens, H. Wagner, **vegan**: Community Ecology Package (2012); <http://cran.r-project.org/package=vegan>).
148. S. Nurk, D. Meleshko, A. Korobeynikov, P. A. Pevzner, MetaSPAdes: A new versatile metagenomic assembler. *Genome Res.* **27**, 824–834 (2017).
149. D. Hyatt, G.-L. Chen, P. F. LoCascio, M. L. Land, F. W. Larimer, L. J. Hauser, Prodigal: Prokaryotic gene recognition and translation initiation site identification. *BMC Bioinformatics* **11**, 119 (2010).
150. T. Aramaki, R. Blanc-Mathieu, H. Endo, K. Ohkubo, M. Kanehisa, S. Goto, H. Ogata, KofamKOALA: KEGG Ortholog assignment based on profile HMM and adaptive score threshold. *Bioinformatics* **36**, 2251–2252 (2020).
151. A. J. Probst, F. J. Elling, C. J. Castelle, Q. Zhu, M. Elvert, G. Birarda, H.-Y. N. Holman, K. R. Lane, B. Ladd, M. C. Ryan, T. Woyke, K.-U. Hinrichs, J. F. Banfield, Lipid analysis of CO<sub>2</sub>-rich subsurface aquifers suggests an autotrophy-based deep biosphere with lysolipids enriched in CPR bacteria. *ISME J.* **14**, 1547–1560 (2020).
152. S. R. Eddy, Accelerated profile HMM searches. *PLOS Comput. Biol.* **7**, e1002195 (2011).
153. P. Menzel, K. L. Ng, A. Krogh, Fast and sensitive taxonomic classification for metagenomics with Kaiju. *Nat. Commun.* **7**, 11257 (2016).
154. G. P. Wagner, K. Kin, V. J. Lynch, Measurement of mRNA abundance using RNA-seq data: RPKM measure is inconsistent among samples. *Theory Biosci.* **131**, 281–285 (2012).
155. H. R. Gruber-Vodicka, B. K. B. Seah, E. Pruesse, PhyloFlash: Rapid small-subunit rRNA profiling and targeted assembly from metagenomes. *mSystems* **5**, e00920-20 (2020).
156. H. Wickham, *ggplot2: Elegant Graphics for Data Analysis*. (Springer-Verlag, 2009); <https://ggplot2.tidyverse.org>.

157. K. R. Clarke, Non-parametric multivariate analyses of changes in community structure. *Austral. J. Ecol.* **18**, 117–143 (1993).
158. J. J. Marlow, I. Colocci, S. P. Jungbluth, N. M. Weber, A. Gartman, J. Kallmeyer, Mapping metabolic activity at single cell resolution in intact volcanic fumarole sediment. *FEMS Microbiol. Lett.* **367**, fnaa031 (2020).
159. S. Crognale, S. Venturi, F. Tassi, S. Rossetti, H. Rashed, J. Cabassi, F. Capecchiacci, B. Nisi, O. Vaselli, H. G. Morrison, M. L. Sogin, S. Fazi, Microbiome profiling in extremely acidic soils affected by hydrothermal fluids: The case of the Solfatara Crater (Campi Flegrei, southern Italy). *FEMS Microbiol. Ecol.* **94**, fyy190 (2018).
160. A. Dutta, P. Sar, J. Sarkar, S. Dutta Gupta, A. Gupta, H. Bose, A. Mukherjee, S. Roy, Archaeal communities in deep terrestrial subsurface underneath the Deccan Traps, India. *Front. Microbiol.* **10**, 1362 (2019).
161. D. V Bekaert, E. Gazel, S. Turner, M. D. Behn, J. M. de Moor, S. Zahirovic, V. C. Manea, K. Hoernle, T. P. Fischer, A. Hammerstrom, A. M. Seltzer, J. T. Kulongoski, B. S. Patel, M. O. Schrenk, S. A. Halldórsson, M. Nakagawa, C. J. Ramírez, J. A. Krantz, M. Yücel, C. J. Ballentine, D. Giovannelli, K. G. Lloyd, P. H. Barry, High  $^3\text{He}/^4\text{He}$  in central Panama reveals a distal connection to the Galápagos plume. *Proc. Natl. Acad. Sci. U.S.A.* **118**, e2110997118 (2021).
162. C. Magnabosco, P. H. A. Timmers, M. C. Y. Lau, G. Borgonie, B. Linage-Alvarez, O. Kuloyo, R. Allea, T. L. Kieft, G. F. Slater, E. van Heerden, B. Sherwood Lollar, T. C. Onstott, Fluctuations in populations of subsurface methane oxidizers in coordination with changes in electron acceptor availability. *FEMS Microbiol. Ecol.* **94**, fyy089 (2018).
163. G. Etiope, I. Vadillo, M. J. Whitham, J. M. Marques, P. M. Carreira, I. Tiago, J. Benavente, P. Jiménez, B. Urresti, Abiotic methane seepage in the Ronda peridotite massif, southern Spain. *Appl. Geochem.* **66**, 101–113 (2016).
164. D. R. Meyer-Dombard, M. R. Osburn, D. Cardace, C. A. Arcilla, The effect of a tropical

climate on available nutrient resources to springs in ophiolite-hosted, deep biosphere ecosystems in the Philippines. *Front. Microbiol.* **10**, 761 (2019).

165. D. Cardace, D. R. Meyer-Dombard, K. M. Woycheese, C. A. Arcilla, Feasible metabolisms in high pH springs of the Philippines. *Front. Microbiol.* **6**, 10 (2015).
166. L. L. Vigni, K. Daskalopoulou, S. Calabrese, K. Kyriakopoulos, F. Parello, F. Brugnone, W. D'Alessandro, Geochemical characterisation of the thermo-mineral waters of Greece. *Environ. Geochem. Health* **44**, 2111–2133 (2022).
167. K. Daskalopoulou, S. Calabrese, F. Grassa, K. Kyriakopoulos, F. Parello, F. Tassi, W. D'Alessandro, Origin of methane and light hydrocarbons in natural fluid emissions: A key study from Greece. *Chem. Geol.* **479**, 286–301 (2018).
168. M. Bomberg, T. Lamminmäki, M. Itävaara, Microbial communities and their predicted metabolic characteristics in deep fracture groundwaters of the crystalline bedrock at Olkiluoto, Finland. *Biogeosciences* **13**, 6031–6047 (2016).
169. R. A. Edwards, B. Rodriguez-Brito, L. Wegley, M. Haynes, M. Breitbart, D. M. Peterson, M. O. Saar, S. Alexander, E. C. Alexander, F. Rohwer, Using pyrosequencing to shed light on deep mine microbial ecology. *BMC Genomics* **7**, 57 (2006).
170. C. Magnabosco, M. Tekere, M. C. Y. Lau, B. Linage, O. Kuloyo, M. Erasmus, E. Cason, E. van Heerden, G. Borgonie, T. L. Kieft, J. Olivier, T. C. Onstott, Comparisons of the composition and biogeographic distribution of the bacterial communities occupying South African thermal springs with those inhabiting deep subsurface fracture water. *Front. Microbiol.* **5**, 679 (2014).
171. H. J. Lavalleur, F. S. Colwell, Microbial characterization of basalt formation waters targeted for geological carbon sequestration. *FEMS Microbiol. Ecol.* **85**, 62–73 (2013).
172. A. A. P. Koppers, T. Yamazaki, J. Geldmacher, IODP Expedition 330: Drilling the Louisville Seamount trail in the SW Pacific. *Sci. Drill.* **15**, 11–22 (2013).
173. J. B. Sylvan, S. D. Wankel, D. E. LaRowe, C. N. Charoenpong, J. A. Huber, C. L. Moyer, K. J.

Edwards, Evidence for microbial mediation of subseafloor nitrogen redox processes at Loihi Seamount, Hawaii. *Geochim. Cosmochim. Acta* **198**, 131–150 (2017).

174. L. A. Zinke, C. Glombitza, J. T. Bird, H. Røy, B. B. Jørgensen, K. G. Lloyd, J. P. Amend, B. K. Reese, Microbial organic matter degradation potential in Baltic Sea sediments is influenced by depositional conditions and *in situ* geochemistry. *Appl. Environ. Microbiol.* **85**, e02164-18 (2019).

175. L. A. Zinke, B. K. Reese, J. McManus, C. G. Wheat, B. N. Orcutt, J. P. Amend, Sediment microbial communities influenced by cool hydrothermal Fluid migration. *Front. Microbiol.* **9**, 1249 (2018).

176. J. Goordial, T. D'Angelo, J. M. Labonté, N. J. Poulton, J. M. Brown, R. Stepanauskas, G. L. Früh-Green, B. N. Orcutt, Microbial diversity and function in shallow subsurface sediment and oceanic lithosphere of the Atlantis Massif. *mBio* **12**, e0049021 (2021).

177. A. Teske, L. J. McKay, A. C. Ravelo, I. Aiello, C. Mortera, F. Núñez-Useche, C. Canet, J. P. Chanton, B. Brunner, C. Hensen, G. A. Ramírez, R. J. Sibert, T. Turner, D. White, C. R. Chambers, A. Buckley, S. B. Joye, S. A. Soule, D. Lizarralde, Characteristics and evolution of sill-driven off-axis hydrothermalism in Guaymas Basin—The Ringvent site. *Sci. Rep.* **9**, 13847 (2019).

178. L. D. Brandt, C. H. House, Marine subsurface microbial community shifts across a hydrothermal gradient in Okinawa trough sediments. *Archaea* **2016**, 2690329 (2016).

179. F. Dowell, Z. Cardman, S. Dasarathy, M. Kellermann, J. S. Lipp, S. E. Ruff, J. F. Biddle, L. McKay, B. J. MacGregor, K. G. Lloyd, D. B. Albert, H. Mendlovitz, K.-U. Hinrichs, A. Teske, Microbial communities in methane- and short chain alkane-rich hydrothermal sediments of Guaymas Basin. *Front. Microbiol.* **7**, 17 (2016).

180. A. Lecoivre, B. Ménez, M. Cannat, V. Chavagnac, E. Gérard, Microbial ecology of the newly discovered serpentinite-hosted Old City hydrothermal field (southwest Indian ridge). *ISME J.* **15**, 818–832 (2021).

181. S. Kleindienst, S. Grim, M. Sogin, A. Bracco, M. Crespo-Medina, S. B. Joye, Diverse, rare microbial taxa responded to the *Deepwater Horizon* deep-sea hydrocarbon plume. *ISME J.* **10**, 400–415 (2016).
182. S. A. Klasek, M. E. Torres, M. Loher, G. Bohrmann, T. Pape, F. S. Colwell, Deep-sourced fluids from a convergent margin host distinct Subseafloor microbial communities that change upon mud flow expulsion. *Front. Microbiol.* **10**, 1436 (2019).
183. A. Angermeyer, S. C. Crosby, J. A. Huber, Decoupled distance-decay patterns between dsrA and 16S rRNA genes among salt marsh sulfate-reducing bacteria. *Environ. Microbiol.* **18**, 75–86 (2016).
184. E. Trembath-Reichert, D. A. Butterfield, J. A. Huber, Active subseafloor microbial communities from Mariana back-arc venting fluids share metabolic strategies across different thermal niches and taxa. *ISME J.* **13**, 2264–2279 (2019).
185. A. Angermeyer, S. C. Crosby, J. A. Huber, Salt marsh sediment bacterial communities maintain original population structure after transplantation across a latitudinal gradient. *PeerJ.* **6**, e4735 (2018).
186. A. Roguet, A. M. Eren, R. J. Newton, S. L. McLellan, Fecal source identification using random forest. *Microbiome.* **6**, 185 (2018).
187. R. J. Newton, S. M. Huse, H. G. Morrison, C. S. Peake, M. L. Sogin, S. L. McLellan, Shifts in the microbial community composition of Gulf coast beaches following beach oiling. *PLOS ONE* **8**, e74265 (2013).
188. S. Feng, M. Bootsma, S. L. McLellan, Human-associated lachnospiraceae genetic markers improve Detection of fecal pollution sources in urban waters. *Appl. Environ. Microbiol.* **84**, e00309-18 (2018).
189. J. A. Bradley, S. Arndt, J. P. Amend, E. Burwicz-Galerne, D. E. LaRowe, Sources and fluxes of organic carbon and energy to microorganisms in global marine sediments. *Front. Microbiol.* **13**, 910694 (2022).
